# Supplementary material
Source: PubMed Central journal article supplement (PMC9459127)
Supplement: mmc1.pdf [file mmc1.pdf]

| Main population groups                        | Definition                                               | Years              | Data sources*                                                                                                                                                                                                                              | Type of accommodation (§)/Diagnosis and drug coding system  | Data authority                                       |
|-----------------------------------------------|----------------------------------------------------------|--------------------|--------------------------------------------------------------------------------------------------------------------------------------------------------------------------------------------------------------------------------------------|-------------------------------------------------------------|------------------------------------------------------|
| <b>Low educational level</b>                  |                                                          |                    |                                                                                                                                                                                                                                            |                                                             | Statistics Denmark                                   |
| Yes                                           | Primary school                                           | Sep 2019           | Register information on highest educational level from the IDA database                                                                                                                                                                    |                                                             |                                                      |
| No                                            | Higher than primary school (missing values included)     |                    |                                                                                                                                                                                                                                            |                                                             |                                                      |
| <b>Homelessness</b>                           |                                                          |                    |                                                                                                                                                                                                                                            |                                                             |                                                      |
|                                               | Experience of homelessness                               | 2018-2020          | Postal address*/The Danish Homeless Register <sup>1</sup> /The Registry of Drug Abusers Undergoing Treatment <sup>2</sup> /The National Registry of Alcohol Treatment <sup>3</sup>                                                         | the Act of Social Services §110; self-reported homelessness | Statistics Denmark/ The Danish Health Data Authority |
|                                               | No experience of homelessness                            | 2018-2020          | No information on homelessness based on the sources above                                                                                                                                                                                  |                                                             |                                                      |
| <b>History of homelessness</b>                |                                                          |                    |                                                                                                                                                                                                                                            |                                                             |                                                      |
|                                               | Any history of homelessness                              | 1996-2020          | Postal address*/The Danish Homeless Register/The Registry of Drug Abusers Undergoing Treatment <sup>2</sup> /The National Registry of Alcohol Treatment <sup>3</sup>                                                                       |                                                             |                                                      |
|                                               | No history of homelessness                               | 1996-2020          | No information on homelessness based on the sources above                                                                                                                                                                                  |                                                             |                                                      |
| <b>Imprisonment</b>                           |                                                          |                    |                                                                                                                                                                                                                                            |                                                             |                                                      |
|                                               | Imprisonment                                             | 2018-2020          | The Danish Central Criminal Register <sup>4</sup>                                                                                                                                                                                          |                                                             | Statistics Denmark                                   |
|                                               | No history of imprisonment                               | 2018-2020          |                                                                                                                                                                                                                                            |                                                             |                                                      |
| <b>Substance abuse</b>                        |                                                          |                    |                                                                                                                                                                                                                                            |                                                             |                                                      |
|                                               | Any alcohol or drug use disorder                         | 1969-2020 (Feb 27) | The Danish Psychiatric Central Research Register/The Danish National Patient Register/The Danish National Prescription Registry <sup>5</sup> /The National Registry of Alcohol Treatment/The Registry of Drug Abusers Undergoing Treatment | ICD-8; ICD-10; ATC                                          | The Danish Health Data Authority                     |
|                                               | No alcohol or drug use disorder                          | 1969-2020 (Feb 27) |                                                                                                                                                                                                                                            |                                                             |                                                      |
| <b>Supported psychiatric housing facility</b> |                                                          |                    |                                                                                                                                                                                                                                            |                                                             |                                                      |
|                                               | Residing in a supported psychiatric housing facility     | 2018-2020          | Postal address*                                                                                                                                                                                                                            | the Act of Social Services §107/108                         | Statistics Denmark                                   |
|                                               | Not residing in a supported psychiatric housing facility | 2018-2020          |                                                                                                                                                                                                                                            |                                                             |                                                      |
| <b>Psychiatric admission</b>                  |                                                          |                    |                                                                                                                                                                                                                                            |                                                             |                                                      |
|                                               | Psychiatric admission                                    | 2019               | The Danish National Patient Register <sup>6</sup>                                                                                                                                                                                          |                                                             | The Danish Health Data Authority                     |
|                                               | No psychiatric admission                                 | 2019               |                                                                                                                                                                                                                                            |                                                             |                                                      |
| <b>Severe mental illness</b>                  |                                                          |                    |                                                                                                                                                                                                                                            |                                                             |                                                      |
|                                               | Any mental diagnosis prior to study start                | 1969-2020 (Feb 27) | The Danish Psychiatric Central Research <sup>7</sup> Register/The Danish National Patient Register <sup>6</sup>                                                                                                                            | ICD-8; ICD-10                                               | The Danish Health Data Authority                     |
|                                               | No mental diagnosis prior to study start                 | 1969-2020 (Feb 27) |                                                                                                                                                                                                                                            |                                                             |                                                      |
| <b>Chronic medical conditions</b>             |                                                          |                    |                                                                                                                                                                                                                                            |                                                             |                                                      |
|                                               | Any chronic medical condition                            | 1977-2020 (Feb 27) | The Danish National Patient Register/ the Danish National Prescription Registry                                                                                                                                                            |                                                             | The Danish Health Data Authority                     |
|                                               | No chronic medical condition                             | 1977-2020 (Feb 27) |                                                                                                                                                                                                                                            |                                                             |                                                      |

| Supplementary population groups                                                                                                                                                                                                                          | Definition                                             | Years              | Data sources                                                                                                                                                                                                                 | Type of accommodation (§)/Diagnosis and drug coding system | Data authority                   |
|----------------------------------------------------------------------------------------------------------------------------------------------------------------------------------------------------------------------------------------------------------|--------------------------------------------------------|--------------------|------------------------------------------------------------------------------------------------------------------------------------------------------------------------------------------------------------------------------|------------------------------------------------------------|----------------------------------|
| <b>Crisis shelter stay</b>                                                                                                                                                                                                                               | Any experience of residing/staying in a crisis shelter | 2018-2020          | Postal address*; Register information on crisis shelter stays                                                                                                                                                                | the Act of Social Services §109                            | Statistics Denmark               |
|                                                                                                                                                                                                                                                          | No experience of residing/staying in a crisis shelter  | 2018-2020          |                                                                                                                                                                                                                              |                                                            |                                  |
| <b>Alcohol use disorder</b>                                                                                                                                                                                                                              | Any alcohol use disorder                               | 1996-2020 (Feb 27) | The Danish Psychiatric Central Research Register/The Danish National Patient Register/The Danish National Prescription Registry/The National Registry of Alcohol Treatment/The Registry of Drug Abusers Undergoing Treatment | ICD-8; ICD-10; ATC                                         | The Danish Health Data Authority |
|                                                                                                                                                                                                                                                          | No alcohol use disorder                                |                    |                                                                                                                                                                                                                              |                                                            |                                  |
| <b>Drug use disorder</b>                                                                                                                                                                                                                                 | Any drug use disorder                                  | 1996-2020 (Feb 27) | The Danish Psychiatric Central Research Register/The Danish National Patient Register/The Danish National Prescription Registry/The National Registry of Alcohol Treatment/The Registry of Drug Abusers Undergoing Treatment | ICD-8; ICD-10; ATC                                         | The Danish Health Data Authority |
|                                                                                                                                                                                                                                                          | No drug use disorder                                   |                    |                                                                                                                                                                                                                              |                                                            |                                  |
| <b>Mental disorder</b>                                                                                                                                                                                                                                   | Any mental diagnosis prior to study start              | 1969-2020 (Feb 27) | The Danish Psychiatric Central Research <sup>7</sup> Register/The Danish National Patient Register <sup>6</sup>                                                                                                              | ICD-8; ICD-10                                              | The Danish Health Data Authority |
|                                                                                                                                                                                                                                                          | No mental diagnosis prior to study start               | 1969-2020 (Feb 27) |                                                                                                                                                                                                                              |                                                            |                                  |
| *Having a postal address during 2018-2020 was defined as the period from Jan 1, 2018 and until Nov 11, 2020 (latest update). The addresses from the “Tilbudsportalen” <sup>8</sup> were validated by corresponding street codes in Denmark. <sup>9</sup> |                                                        |                    |                                                                                                                                                                                                                              |                                                            |                                  |
| <b>Supplementary table 1: Definitions of population groups with data sources</b>                                                                                                                                                                         |                                                        |                    |                                                                                                                                                                                                                              |                                                            |                                  |

| <b>Disease group</b>                                                                                                                                             | <b>Coding definition</b>                                      | <b>ICD-10 (Diagnosis time frame)</b> | <b>ICD-8</b>                                                                                                                   | <b>Drug codes (ATC) (Time frame for prescriptions)</b> |
|------------------------------------------------------------------------------------------------------------------------------------------------------------------|---------------------------------------------------------------|--------------------------------------|--------------------------------------------------------------------------------------------------------------------------------|--------------------------------------------------------|
| <b>Mental disorder</b>                                                                                                                                           | Diagnosis                                                     | F00, F20-F99                         | 290-315 (excl. 291.x9, 303.x9, 303.20, 303.28, 303.90, 571.00, 571.01, 294.39, 304.x9)                                         |                                                        |
| <b>Any severe mental illness</b>                                                                                                                                 | Diagnosis                                                     | F20, F30-31, F32-33                  | 295.09, 295.19, 295.29, 295.39, 295.49, 295.59, 295.69, 295.89, 295.99, 296.19, 296.39, 298.19, 296.09, 296.29, 298.09, 300.49 |                                                        |
| <b>Any substance abuse</b>                                                                                                                                       | Diagnosis AND/OR prescriptions AND/OR self-report             | F10-F19                              | 291.x9, 303.x9, 303.20, 303.28, 303.90, 571.00, 571.01, 294.39, 304.x9                                                         | N07BB (alcohol dependence), N07BC (opioids dependence) |
| Alcohol use disorder                                                                                                                                             | Diagnosis AND/OR prescriptions AND/OR self-report             | F10                                  | 291.x9, 303.x9, 303.20, 303.28, 303.90, 571.00, 571.01                                                                         | N07BB (alcohol dependence)                             |
| Drug use disorder                                                                                                                                                | Diagnosis AND/OR prescriptions for opioids AND/OR self-report | F11-F19                              | 294.39, 304.x9                                                                                                                 | N07BC (opioids dependence)                             |
| *Diagnoses are defined primarily according to the study of Momen et al. 2020, <sup>10</sup> but with addition of some ATC-codes for the substance use disorders. |                                                               |                                      |                                                                                                                                |                                                        |
| <b>Supplementary table 2: Definitions of psychiatric disorders based on ICD-10, ICD-8, and ATC-codes*</b>                                                        |                                                               |                                      |                                                                                                                                |                                                        |

| Category                              | Disease group                       | Coding definition                                                                        | ICD-10 Codes                                 | Drug codes (ATC) (Time frame for prescriptions)         |
|---------------------------------------|-------------------------------------|------------------------------------------------------------------------------------------|----------------------------------------------|---------------------------------------------------------|
| <b>Any chronic medical condition*</b> |                                     |                                                                                          |                                              |                                                         |
| <b>Circulatory system</b>             |                                     |                                                                                          |                                              |                                                         |
|                                       | Hypertension                        | Diagnosis AND/OR prescriptions of antihypertensives <sup>†</sup>                         | I10-I13, I15                                 | C02, C03, C04, C07, C08, C09 (Twice in 1 year)          |
|                                       | Dyslipidemia                        | Diagnosis AND/OR prescription of lipid-lowering drugs <sup>‡</sup>                       | E78                                          | C10 (Twice in 1 year)                                   |
|                                       | Ischemic heart disease              | Diagnosis AND/OR prescription for antianginal drug                                       | I20-I25                                      | C01DA (Twice in 1 year)                                 |
|                                       | Atrial fibrillation                 | Diagnosis                                                                                | I48                                          |                                                         |
|                                       | Heart failure                       | Diagnosis                                                                                | I50                                          |                                                         |
|                                       | Peripheral artery occlusive disease | Diagnosis                                                                                | I70-I74                                      |                                                         |
|                                       | Stroke                              | Diagnosis                                                                                | I60-I64, I69                                 |                                                         |
| <b>Endocrine system</b>               |                                     |                                                                                          |                                              |                                                         |
|                                       | Diabetes mellitus                   | Diagnosis AND/OR prescription of antidiabetics                                           | E10-E14                                      | A10A, A10B (Twice in 1 year)                            |
|                                       | Thyroid disorder                    | Diagnosis AND/OR prescription of thyroid therapy drugs                                   | E00-E05, E061-E069, E07                      | H03 (Twice in 1 year)                                   |
|                                       | Gout                                | Diagnosis                                                                                | E79, M10                                     |                                                         |
| <b>Pulmonary system and allergy</b>   |                                     |                                                                                          |                                              |                                                         |
|                                       | Chronic pulmonary disease           | Diagnosis AND/OR Prescription for obstructive airway disease drugs                       | J40-J47                                      | R03 (Twice in 1 year)                                   |
|                                       | Allergy                             | Diagnosis AND/OR prescription for non-sedative antihistamines AND/OR nasal antiallergics | J30.1-J30.4, L23, L50.0, T78.0, T78.2, T78.4 | R06AX, R06AE07, R06AE09, R01AC, R01AD (Twice in 1 year) |
| <b>Gastrointestinal system</b>        |                                     |                                                                                          |                                              |                                                         |
|                                       | Ulcer/chronic gastritis             | Diagnosis                                                                                | K221, K25-K28, K293-K295                     |                                                         |
|                                       | Chronic liver disease               | Diagnosis                                                                                | B16-B19, K70, K74, K766, I85                 |                                                         |
|                                       | Inflammatory bowel disease          | Diagnosis                                                                                | K50-K51                                      |                                                         |
|                                       | Diverticular disease of intestine   | Diagnosis                                                                                | K57                                          |                                                         |
| <b>Urogenital system</b>              |                                     |                                                                                          |                                              |                                                         |
|                                       | Chronic kidney disease              | Diagnosis                                                                                | N03, N11, N18-N19 (ever)                     |                                                         |
|                                       | Prostate disorders                  | Diagnosis AND/OR prescription of prostate hyperplasia therapy drugs                      | N40                                          | C02CA, G04C (Twice in 1 year)                           |
| <b>Musculoskeletal system</b>         |                                     |                                                                                          |                                              |                                                         |
|                                       | Connective tissue disorders         |                                                                                          | M05-M06, M08-M09, M30-M36, D86 (ever)        |                                                         |
|                                       | Osteoporosis                        | Diagnosis AND/OR prescriptions for osteoporosis drugs                                    | M80-M82 (ever)                               | M05B, G03XC01, H05AA (Twice in 1 year)                  |
|                                       | Painful condition                   | Repeated prescriptions of analgesics                                                     |                                              | N02A, N02BA51, N02BE, M01A, M02A (Four times in 1 year) |
| <b>Hematological system</b>           |                                     |                                                                                          |                                              |                                                         |
|                                       | HIV/AIDS                            | Diagnosis                                                                                | B20-B24                                      |                                                         |
|                                       | Anemias                             | Diagnosis                                                                                | D50-D53, D55-D59, D60-D61, D63-D64           |                                                         |
| <b>Cancers</b>                        |                                     |                                                                                          |                                              |                                                         |
|                                       | Cancer                              | Diagnosis                                                                                | C00-C43, C45-C97                             |                                                         |
| <b>Neurological system</b>            |                                     |                                                                                          |                                              |                                                         |
|                                       | Vision problem                      | Diagnosis                                                                                | H40, H25, H54 (ever)                         |                                                         |
|                                       | Hearing problem                     | Diagnosis                                                                                | H90-H91, H931 (ever)                         |                                                         |
|                                       | Migraine                            | Diagnosis AND/OR prescription of specific anti-migraine drugs                            | G43                                          | N02C (Twice in 1 year)                                  |
|                                       | Epilepsy                            | Diagnosis AND prescription of anti-epileptics                                            | G40-G41                                      | N03 (Twice in 1 year)                                   |
|                                       | Parkinson's disease                 | Diagnosis                                                                                | G20-G22                                      |                                                         |
|                                       | Multiple sclerosis                  | Diagnosis                                                                                | G35                                          |                                                         |

Neuropathies

Diagnosis

G50-G64

\*The chronic medical conditions are defined primarily according to previous studies.<sup>10,11</sup> They are based on ICD-10 diagnoses since 1994 and until February 27, 2020 (study start). †Ascertained only in absence of ischemic heart disease/heart failure, and by diuretics only if no kidney disease. ‡Prescriptions used if no previous ischemic heart disease.

***Supplementary table 3: Algorithm for chronic medical health conditions***

Supplementary figure 1. Flow-chart

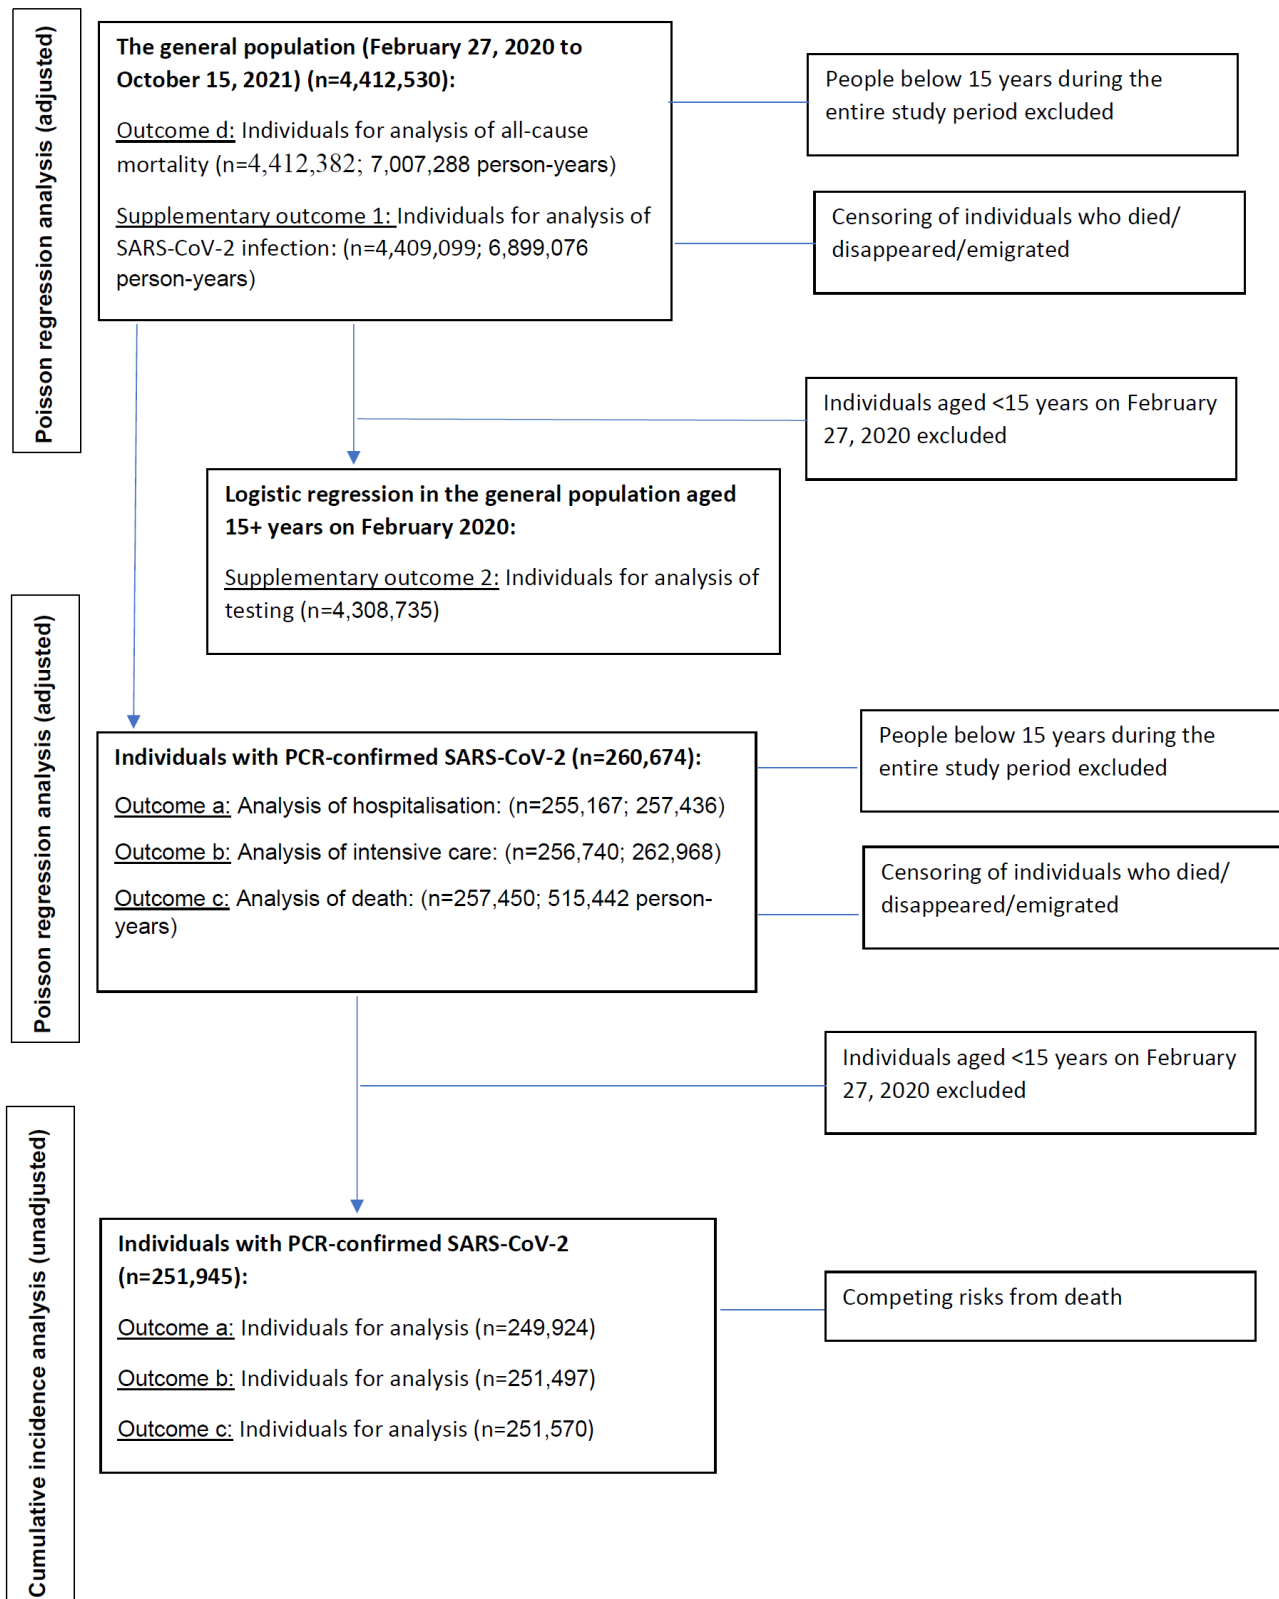

|                                                                                                                             | <b>Hospital admission (%)</b> | <b>Individuals with SARS-CoV-2</b> | <b>CIF % Day 14</b> | <b>95% CI</b> | <b>P-value</b> |
|-----------------------------------------------------------------------------------------------------------------------------|-------------------------------|------------------------------------|---------------------|---------------|----------------|
| The Danish general population                                                                                               | 11,287 (4.5)                  | 249,924                            | 4.5                 | (4.5-4.6)     |                |
| <b>Sex</b>                                                                                                                  |                               |                                    |                     |               |                |
| Male                                                                                                                        | 6094 (5.0)                    | 122,589                            | 5.0                 | (4.9-5.1)     | <0.0001        |
| Female                                                                                                                      | 5193 (4.1)                    | 127,335                            | 4.1                 | (4.0-4.2)     |                |
| <b>Low educational level</b>                                                                                                |                               |                                    |                     |               |                |
| Yes                                                                                                                         | 3874 (5.3)                    | 73,803                             | 5.3                 | (5.1-5.4)     | <0.0001        |
| No                                                                                                                          | 7413 (4.2)                    | 176,121                            | 4.2                 | (4.1-4.3)     |                |
| <b>Homelessness</b>                                                                                                         |                               |                                    |                     |               |                |
| Yes                                                                                                                         | 31 (11.5)                     | 269                                | 11.6                | (8.1-15.7)    | <0.0001        |
| No                                                                                                                          | 11,256 (4.5)                  | 249,655                            | 4.5                 | (4.5-4.6)     |                |
| <b>Crisis shelter stay</b>                                                                                                  |                               |                                    |                     |               |                |
| Yes                                                                                                                         | 9 (3.6)                       | 250                                | 3.6                 | (1.8-6.5)     | 0.50           |
| No                                                                                                                          | 11,278 (4.5)                  | 249,674                            | 4.5                 | (4.5-4.6)     |                |
| <b>Imprisonment</b>                                                                                                         |                               |                                    |                     |               |                |
| Yes                                                                                                                         | 112 (6.0)                     | 1882                               | 6.0                 | (5.0-7.2)     | 0.0020         |
| No                                                                                                                          | 11,175 (4.5)                  | 248,042                            | 4.5                 | (4.5-4.6)     |                |
| <b>Substance abuse</b>                                                                                                      |                               |                                    |                     |               |                |
| Yes                                                                                                                         | 944 (7.9)                     | 11,893                             | 8.0                 | (7.5-8.5)     | <0.0001        |
| No                                                                                                                          | 10,343 (4.4)                  | 238,031                            | 4.4                 | (4.3-4.5)     |                |
| <b>Alcohol use disorder</b>                                                                                                 |                               |                                    |                     |               |                |
| Yes                                                                                                                         | 589 (8.4)                     | 7039                               | 8.4                 | (7.8-9.1)     | <0.0001        |
| No                                                                                                                          | 10,698 (4.4)                  | 242,885                            | 4.4                 | (4.4-4.5)     |                |
| <b>Drug use disorder</b>                                                                                                    |                               |                                    |                     |               |                |
| Yes                                                                                                                         | 493 (7.9)                     | 6283                               | 7.9                 | (7.2-8.6)     | <0.0001        |
| No                                                                                                                          | 10,794 (4.4)                  | 243,641                            | 4.5                 | (4.4-4.5)     |                |
| <b>Supported psychiatric housing</b>                                                                                        |                               |                                    |                     |               |                |
| Yes                                                                                                                         | 39 (9.4)                      | 417                                | 9.4                 | (6.8-12.5)    | <0.0001        |
| No                                                                                                                          | 11,248 (4.5)                  | 249,507                            | 4.5                 | (4.5-12.5)    |                |
| <b>Psychiatric admission</b>                                                                                                |                               |                                    |                     |               |                |
| Yes                                                                                                                         | 100 (13.5)                    | 739                                | 13.6                | (11.2-16.2)   | <0.0001        |
| No                                                                                                                          | 11,187 (4.5)                  | 249,185                            | 4.5                 | (4.4-4.6)     |                |
| <b>Severe mental illness</b>                                                                                                |                               |                                    |                     |               |                |
| Yes                                                                                                                         | 1083 (10.0)                   | 10,819                             | 10.1                | (9.5-10.7)    | <0.0001        |
| No                                                                                                                          | 10,204 (4.3)                  | 239,105                            | 4.3                 | (4.2-4.4)     |                |
| <b>Mental disorder</b>                                                                                                      |                               |                                    |                     |               |                |
| Yes                                                                                                                         | 2545 (7.8)                    | 32,779                             | 7.8                 | (7.5-8.1)     | <0.0001        |
| No                                                                                                                          | 8742 (4.0)                    | 217,145                            | 4.1                 | (4.0-4.1)     |                |
| <b>Chronic medical condition</b>                                                                                            |                               |                                    |                     |               |                |
| Yes                                                                                                                         | 9723 (7.4)                    | 131,846                            | 7.4                 | (7.3-7.6)     | <0.0001        |
| No                                                                                                                          | 1564 (1.3)                    | 118,078                            | 1.3                 | (1.3-1.4)     |                |
| CIF=cumulative incidence function                                                                                           |                               |                                    |                     |               |                |
| <b>Supplementary table 4. Cumulative incidence of hospital admission 14 days after a PCR-confirmed SARS-CoV-2 infection</b> |                               |                                    |                     |               |                |

|                                      | Hospital admissions | Person-years | IR per 1000 person-years | (95% CI)    | IRR (model 1)* | (95% CI)    | P value | IRR (model 2)† | (95% CI)    | P value |
|--------------------------------------|---------------------|--------------|--------------------------|-------------|----------------|-------------|---------|----------------|-------------|---------|
| Total                                | 11,232              | 10,057       | 112                      | (110-114)   |                |             |         |                |             |         |
| <b>Sex</b>                           |                     |              |                          |             |                |             |         |                |             |         |
| Male                                 | 6062                | 4923         | 123                      | (120-126)   | 1.36           | (1.31-1.41) | <0.0001 | 1.36           | (1.31-1.41) | <0.0001 |
| Female                               | 5170                | 5134         | 101                      | (98-103)    | 1              |             |         | 1              |             |         |
| <b>Low educational level</b>         |                     |              |                          |             |                |             |         |                |             |         |
| Yes                                  | 3853                | 3109         | 1239                     | (1201-1279) | 1.44           | (1.38-1.50) | <0.0001 | 1.28           | (1.23-1.33) | <0.0001 |
| No                                   | 7379                | 6948         | 1062                     | (1038-1087) | 1              |             |         | 1              |             |         |
| <b>Crisis shelter stay</b>           |                     |              |                          |             |                |             |         |                |             |         |
| Yes                                  | 9                   | 10           | 893                      | (465-1717)  | 2.75           | (1.43-5.30) | 0.0093  | 1.93           | (1.00-3.71) | 0.076   |
| No                                   | 11,223              | 10,047       | 1117                     | (1097-1138) | 1              |             |         | 1              |             |         |
| <b>Homelessness</b>                  |                     |              |                          |             |                |             |         |                |             |         |
| Yes                                  | 33                  | 11           | 3084                     | (2192-4338) | 4.36           | (3.09-6.14) | <0.0001 | 3.30           | (2.34-4.65) | <0.0001 |
| No                                   | 11,199              | 10,046       | 1115                     | (1094-1136) | 1              |             |         | 1              |             |         |
| <b>Imprisonment</b>                  |                     |              |                          |             |                |             |         |                |             |         |
| Yes                                  | 113                 | 76           | 1491                     | (1240-1792) | 1.99           | (1.65-2.40) | <0.0001 | 1.62           | (1.35-1.96) | <0.0001 |
| No                                   | 11,119              | 9981         | 1114                     | (1094-1135) | 1              |             |         | 1              |             |         |
| <b>Substance abuse</b>               |                     |              |                          |             |                |             |         |                |             |         |
| Yes                                  | 938                 | 454          | 2067                     | (1939-2203) | 1.52           | (1.42-1.62) | <0.0001 | 1.59           | (1.49-1.70) | <0.0001 |
| No                                   | 10,294              | 9603         | 1072                     | (1051-1093) | 1              |             |         | 1              |             |         |
| <b>Alcohol use disorder</b>          |                     |              |                          |             |                |             |         |                |             |         |
| Yes                                  | 585                 | 268          | 2183                     | (2013-2368) | 1.46           | (1.35-1.59) | <0.0001 | 1.59           | (1.46-1.73) | <0.0001 |
| No                                   | 10,647              | 9789         | 1088                     | (1067-1109) | 1              |             |         | 1              |             |         |
| <b>Drug use disorder</b>             |                     |              |                          |             |                |             |         |                |             |         |
| Yes                                  | 489                 | 240          | 2041                     | (1868-2230) | 1.64           | (1.49-1.79) | <0.0001 | 1.65           | (1.50-1.80) | <0.0001 |
| No                                   | 10,743              | 9817         | 1094                     | (1074-1115) | 1              |             |         | 1              |             |         |
| <b>Supported psychiatric housing</b> |                     |              |                          |             |                |             |         |                |             |         |
| Yes                                  | 39                  | 16           | 2409                     | (1760-3297) | 2.79           | (2.04-3.83) | <0.0001 | 2.97           | (2.17-4.07) | <0.0001 |
| No                                   | 11,193              | 10,041       | 1115                     | (1094-1136) | 1              |             |         | 1              |             |         |
| <b>Psychiatric admission</b>         |                     |              |                          |             |                |             |         |                |             |         |
| Yes                                  | 99                  | 27           | 3609                     | (2964-4395) | 1.24           | (1.02-1.51) | 0.041   | 1.29           | (1.05-1.57) | 0.0018  |
| No                                   | 11,133              | 10,029       | 10,029                   | (1090-1131) | 1              |             |         | 1              |             |         |
| <b>Severe mental illness</b>         |                     |              |                          |             |                |             |         |                |             |         |
| Yes                                  | 1073                | 409          | 2622                     | (2470-2784) | 1.71           | (1.61-1.82) | <0.0001 | 1.63           | (1.53-1.74) | <0.0001 |
| No                                   | 10,159              | 9648         | 1053                     | (1033-1074) | 1              |             |         | 1              |             |         |
| <b>Mental disorder</b>               |                     |              |                          |             |                |             |         |                |             |         |
| Yes                                  | 2531                | 1279         | 1979                     | (1903-2057) | 1.58           | (1.51-1.65) | <0.0001 | 1.52           | (1.45-1.59) | <0.0001 |
| No                                   | 8701                | 8778         | 991                      | (971-1012)  | 1              |             |         | 1              |             |         |
| <b>Chronic medical condition</b>     |                     |              |                          |             |                |             |         |                |             |         |
| Yes                                  | 8707                | 4066         | 2142                     | (2097-2187) | 1.97           | (1.88-2.07) | <0.0001 | 1.92           | (1.83-2.02) | <0.0001 |
| No                                   | 2525                | 5991         | 421                      | (405-438)   | 1              |             |         | 1              |             |         |

IR=incidence rate, IRR=incidence rate ratio  
\*Model 1 is adjusted for age (5-years age groups), calendar time (months), and sex. †Model 2 is additionally adjusted for country of origin, area of living, and vaccination status.

**Supplementary table 5: Risk of hospital admission within 14 days after a PCR-confirmed SARS-CoV-2 infection**



| Population groups                    | Hospitalisation within 14 days |             |         | Intensive care within 14 days |             |         | Death within 60 days |             |         |
|--------------------------------------|--------------------------------|-------------|---------|-------------------------------|-------------|---------|----------------------|-------------|---------|
|                                      | IRR*                           | (95% CI)    | P value | IRR*                          | (95% CI)    | P value | MRR*                 | (95% CI)    | P value |
| <b>Low educational level</b>         |                                |             |         |                               |             |         |                      |             |         |
| Yes                                  | 1.23                           | (1.18-1.28) | <0.0001 | 1.34                          | (1.20-1.51) | <0.0001 | 1.34                 | (1.24-1.45) | <0.0001 |
| No                                   | 1                              |             |         | 1                             |             |         | 1                    |             |         |
| <b>Homelessness</b>                  |                                |             |         |                               |             |         |                      |             |         |
| Yes                                  | 2.09                           | (1.46-2.99) | 0.00027 | 1.73                          | (0.66-4.55) | 0.30    | 3.79                 | (1.60-8.95) | 0.0099  |
| No                                   | 1                              |             |         | 1                             |             |         | 1                    |             |         |
| <b>Imprisonment</b>                  |                                |             |         |                               |             |         |                      |             |         |
| Yes                                  | 1.26                           | (1.04-1.52) | 0.021   | 1.71                          | (1.10-2.66) | 0.027   | 1.98                 | (1.22-3.21) | 0.013   |
| No                                   | 1                              |             |         | 1                             |             |         | 1                    |             |         |
| <b>Substance abuse</b>               |                                |             |         |                               |             |         |                      |             |         |
| Yes                                  | 1.37                           | (1.27-1.46) | <0.0001 | 1.24                          | (1.02-1.50) | 0.032   | 1.82                 | (1.62-2.05) | <0.0001 |
| No                                   | 1                              |             |         | 1                             |             |         | 1                    |             |         |
| <b>Supported psychiatric housing</b> |                                |             |         |                               |             |         |                      |             |         |
| Yes                                  | 2.03                           | (1.46-2.81) | 0.00013 | ...                           | ...         |         | 1.63                 | (0.86-3.06) | 0.16    |
| No                                   | 1                              |             |         | ...                           | ...         |         | 1                    |             |         |
| <b>Psychiatric admission</b>         |                                |             |         |                               |             |         |                      |             |         |
| Yes                                  | 1.12                           | (0.91-1.36) | 0.29    | 1.77                          | (1.02-3.07) | 0.063   | 1.55                 | (1.23-1.96) | 0.00052 |
| No                                   | 1                              |             |         | 1                             |             |         | 1                    |             |         |
| <b>Severe mental illness</b>         |                                |             |         |                               |             |         |                      |             |         |
| Yes                                  | 1.43                           | (1.34-1.52) | <0.0001 | 1.30                          | (1.07-1.57) | 0.011   | 1.42                 | (1.26-1.59) | <0.0001 |
| No                                   | 1                              |             |         | 1                             |             |         | 1                    |             |         |
| <b>Chronic medical conditions</b>    |                                |             |         |                               |             |         |                      |             |         |
| Yes                                  | 1.85                           | (1.76-1.95) | <0.0001 | 1.76                          | (1.53-2.04) | <0.0001 | 1.54                 | (1.35-1.77) | <0.0001 |
| No                                   | 1                              |             |         | 1                             |             |         | 1                    |             |         |

IRR=incidence rate ratio, MRR=mortality rate ratio  
\*Adjusted for 5-year age groups, calendar time in months, sex, country of origin, area of living, vaccination status, and all other population groups listed in the table.

**Supplementary table 6: Risk of adverse outcomes in individuals with PCR-confirmed SARS-CoV-2 infection with mutually adjustment**

|                                                 | Hospital admissions | Person-years | Adjusted IRR* | (95% CI)    | P value for the interaction |
|-------------------------------------------------|---------------------|--------------|---------------|-------------|-----------------------------|
| Total                                           | 11,232              | 10,057       |               |             |                             |
| <b>Sex</b>                                      |                     |              |               |             |                             |
| Male                                            | 6062                | 4923         | 1.36          | (1.31-1.41) |                             |
| Female                                          | 5170                | 5134         | 1             |             |                             |
| <b>Educational level*sex</b>                    |                     |              |               |             |                             |
| <b>Low educational level males</b>              |                     |              |               |             | 0.71                        |
| Yes                                             | 1903                | 1603         | 1.27          | (1.20-1.34) |                             |
| No                                              | 4159                | 3320         | 1             |             |                             |
| <b>Low educational level females</b>            |                     |              |               |             |                             |
| Yes                                             | 1950                | 1506         | 1.29          | (1.21-1.36) |                             |
| No                                              | 3220                | 3627         | 1             |             |                             |
| <b>Homelessness*sex</b>                         |                     |              |               |             |                             |
| <b>Homelessness in males</b>                    |                     |              |               |             | 0.076                       |
| Yes                                             | 21                  | 7            | 2.72          | (1.77-4.17) |                             |
| No                                              | 6041                | 4916         | 1             |             |                             |
| <b>Homelessness in females</b>                  |                     |              |               |             |                             |
| Yes                                             | 12                  | 4            | 5.30          | (3.00-9.34) |                             |
| No                                              | 5158                | 5130         | 1             |             |                             |
| <b>Imprisonment*sex</b>                         |                     |              |               |             |                             |
| <b>Imprisonment in males</b>                    |                     |              |               |             | 0.37                        |
| Yes                                             | 107                 | 72           | 1.60          | (1.32-1.93) |                             |
| No                                              | 5955                | 4851         | 1             |             |                             |
| <b>Imprisonment in females</b>                  |                     |              |               |             |                             |
| Yes                                             | 6                   | 4            | 2.39          | (1.07-5.31) |                             |
| No                                              | 5164                | 5130         | 1             |             |                             |
| <b>Substance abuse*sex</b>                      |                     |              |               |             |                             |
| <b>Substance abuse in males</b>                 |                     |              |               |             | 0.40                        |
| Yes                                             | 577                 | 260          | 1.56          | (1.43-1.70) |                             |
| No                                              | 5485                | 4663         | 1             |             |                             |
| <b>Substance abuse in females</b>               |                     |              |               |             |                             |
| Yes                                             | 361                 | 193          | 1.65          | (1.48-1.84) |                             |
| No                                              | 4809                | 4940         | 1             |             |                             |
| <b>Supported psychiatric housing*sex</b>        |                     |              |               |             |                             |
| <b>Supported psychiatric housing in males</b>   |                     |              |               |             | 0.39                        |
| Yes                                             | 22                  | 10           | 2.65          | (1.74-4.03) |                             |
| No                                              | 6040                | 4913         | 1             |             |                             |
| <b>Supported psychiatric housing in females</b> |                     |              |               |             |                             |
| Yes                                             | 17                  | 7            | 3.51          | (2.18-5.65) |                             |
| No                                              | 5153                | 5127         | 1             |             |                             |
| <b>Psychiatric admission*sex</b>                |                     |              |               |             |                             |
| <b>Psychiatric admission in males</b>           |                     |              |               |             | 0.072                       |
| Yes                                             | 49                  | 12           | 1.57          | (1.18-2.08) |                             |
| No                                              | 6013                | 4911.5       | 1             |             |                             |
| <b>Psychiatric admission in females</b>         |                     |              |               |             |                             |
| Yes                                             | 50                  | 16           | 1.09          | (0.82-1.44) |                             |
| No                                              | 5120                | 5118         | 1             |             |                             |
| <b>Severe mental illness*sex</b>                |                     |              |               |             |                             |
| <b>Severe mental illness in males</b>           |                     |              |               |             | 0.12                        |
| Yes                                             | 444                 | 135          | 1.73          | (1.57-1.90) |                             |
| No                                              | 5618                | 4788.6       | 1             |             |                             |

|                                                                                                                                                                                                                                     |      |      |      |             |                     |
|-------------------------------------------------------------------------------------------------------------------------------------------------------------------------------------------------------------------------------------|------|------|------|-------------|---------------------|
| <b>Severe mental illness in females</b>                                                                                                                                                                                             |      |      |      |             |                     |
| Yes                                                                                                                                                                                                                                 | 629  | 275  | 1.56 | (1.44-1.70) |                     |
| No                                                                                                                                                                                                                                  | 4541 | 4859 | 1    |             |                     |
| <b>Chronic medical condition*sex</b>                                                                                                                                                                                                |      |      |      |             |                     |
| <b>Chronic medical condition in males</b>                                                                                                                                                                                           |      |      |      |             |                     |
| Yes                                                                                                                                                                                                                                 | 4608 | 1829 | 2.04 | (1.92-2.17) | 0.0018 <sup>†</sup> |
| No                                                                                                                                                                                                                                  | 1454 | 3094 | 1    |             |                     |
| <b>Chronic medical condition in females</b>                                                                                                                                                                                         |      |      |      |             |                     |
| Yes                                                                                                                                                                                                                                 | 4099 | 2236 | 1.77 | (1.65-1.90) |                     |
| No                                                                                                                                                                                                                                  | 1071 | 2897 | 1    |             |                     |
| IRR=incidence rate ratio.                                                                                                                                                                                                           |      |      |      |             |                     |
| *Adjusted for age (5-years age groups), calendar time (months), country of origin, area of living, and vaccination status. **Interaction analysis of sex*each population group. <sup>†</sup> Statistically significant interaction. |      |      |      |             |                     |
| <b>Supplementary table 7: Risk of hospital admission within 14 days after a PCR-confirmed SARS-CoV-2 infection by population group and by sex</b>                                                                                   |      |      |      |             |                     |

|                                                          | Admission within 14 days | Person-years | Adjusted MRR* | (95% CI)    | RERI† | (95% CI)      |
|----------------------------------------------------------|--------------------------|--------------|---------------|-------------|-------|---------------|
| Total                                                    | 11,232                   | 10,057       |               |             |       |               |
| <b>Low educational level</b>                             |                          |              |               |             |       |               |
| Male with low educational level                          | 1903                     | 1603         | 1.75          | (1.65-1.85) | 0.082 | (-0.029-0.19) |
| Female with low educational level                        | 1950                     | 1506         | 1.29          | (1.21-1.36) |       |               |
| Male with high educational level                         | 4159                     | 3320         | 1.38          | (1.32-1.44) |       |               |
| Female with high educational level (reference)           | 3220                     | 3627         | 1             |             |       |               |
| <b>Experience of homelessness</b>                        |                          |              |               |             |       |               |
| Male with experiences of homelessness                    | 21                       | 7            | 3.68          | (2.40-5.66) | -1.98 | (-5.36-1.42)  |
| Female with experiences of homelessness                  | 12                       | 4            | 5.30          | (3.00-9.34) |       |               |
| Male with experiences of homelessness                    | 6041                     | 4916         | 1.36          | (1.31-1.41) |       |               |
| Female without experiences of homelessness (reference)   | 5158                     | 5130         | 1             |             |       |               |
| <b>Experience of imprisonment</b>                        |                          |              |               |             |       |               |
| Male with experiences of imprisonment                    | 107                      | 72           | 2.15          | (1.77-2.61) | -0.59 | (-2.54-1.37)  |
| Female with experiences of imprisonment                  | 6                        | 4            | 2.39          | (1.07-5.31) |       |               |
| Male with experiences of imprisonment                    | 5955                     | 4851         | 1.35          | (1.30-1.40) |       |               |
| Female without experiences of imprisonment (reference)   | 5164                     | 5130         | 1             |             |       |               |
| <b>Substance abuse</b>                                   |                          |              |               |             |       |               |
| Male with substance abuse                                | 577                      | 260          | 2.10          | (1.92-2.29) | 0.10  | (-0.15-0.34)  |
| Female with substance abuse                              | 361                      | 193          | 1.65          | (1.48-1.84) |       |               |
| Male without substance abuse                             | 5485                     | 4663         | 1.35          | (1.30-1.40) |       |               |
| Female without substance abuse (reference)               | 4809                     | 4940         | 1             |             |       |               |
| <b>Supported psychiatric housing</b>                     |                          |              |               |             |       |               |
| Male with supported psychiatric housing                  | 22                       | 10           | 3.60          | (2.36-5.47) | -0.27 | (-2.52-1.98)  |
| Female with supported psychiatric housing                | 17                       | 7            | 3.51          | (2.18-5.65) |       |               |
| Male without supported psychiatric housing               | 6040                     | 4914         | 1.36          | (1.31-1.41) |       |               |
| Female without supported psychiatric housing (reference) | 5153                     | 5127         | 1             |             |       |               |
| <b>Psychiatric admission</b>                             |                          |              |               |             |       |               |
| Male with psychiatric admission                          | 49                       | 12           | 2.13          | (1.60-2.82) | 0.69  | (-0.013-1.38) |
| Female with psychiatric admission                        | 50                       | 16           | 1.09          | (0.82-1.44) |       |               |
| Male without psychiatric admission                       | 6013                     | 4912         | 1.35          | (1.30-1.41) |       |               |
| Female without psychiatric admission (reference)         | 5120                     | 5118         | 1             |             |       |               |
| <b>Severe mental illness</b>                             |                          |              |               |             |       |               |
| Male with severe mental illness                          | 444                      | 135          | 2.37          | (2.15-2.61) | 0.44  | (0.18-0.69)** |
| Female with severe mental illness                        | 629                      | 275          | 1.56          | (1.44-1.70) |       |               |
| Male without severe mental illness                       | 5618                     | 4789         | 1.37          | (1.32-1.43) |       |               |
| Female without severe mental illness (reference)         | 4541                     | 4859         | 1             |             |       |               |
| <b>Chronic medical condition</b>                         |                          |              |               |             |       |               |
| Male with chronic medical condition                      | 4608                     | 1829         | 2.55          | (2.38-2.74) | 0.53  | (0.42-0.65)** |
| Female with chronic medical condition                    | 4099                     | 2236         |               |             |       |               |
| Male without chronic medical condition                   | 1454                     | 3094         | 1.25          | (1.16-1.35) |       |               |
| Female without chronic medical condition (reference)     | 1071                     | 2897         | 1.77          | (1.65-1.90) |       |               |

IRR=incidence rate ratio, RERI=Relative Excess Risk due to Interaction  
\*Adjusted for age (5-years age groups), calendar time (months), country of origin, area of living, and vaccination status. \*\*Statistically significant interaction.  
†RERI indicates whether the effect of the specific exposure on outcome would be greater in males than in females (reference group) with 95% CI calculated. For CIs not including 0, RERI was statistically significant.

**Supplementary table 8: Analysis of effect modification of exposures on hospitalisation by sex among people with PCR-confirmed SARS-CoV-2 infection**

|                                                                                                                                                                                                                                      | ICU admissions (%) | Individuals with SARS-CoV-2 infection | CIF % Day 14 | 95% CI    | P-value |
|--------------------------------------------------------------------------------------------------------------------------------------------------------------------------------------------------------------------------------------|--------------------|---------------------------------------|--------------|-----------|---------|
| The Danish general population                                                                                                                                                                                                        | 1413 (0.6)         | 251,497                               | 0.6          | (0.5-0.6) |         |
| <b>Sex</b>                                                                                                                                                                                                                           |                    |                                       |              |           |         |
| Male                                                                                                                                                                                                                                 | 930 (0.8)          | 123,502                               | 0.8          | (0.7-0.8) | <0.0001 |
| Female                                                                                                                                                                                                                               | 483 (0.4)          | 127,995                               | 0.4          | (0.3-0.4) |         |
| <b>Low educational level</b>                                                                                                                                                                                                         |                    |                                       |              |           |         |
| Yes                                                                                                                                                                                                                                  | 493 (0.7)          | 74,353                                | 0.7          | (0.6-0.7) | <0.0001 |
| No                                                                                                                                                                                                                                   | 920 (0.5)          | 177,144                               | 0.5          | (0.5-0.6) |         |
| <b>History of homelessness<sup>†</sup></b>                                                                                                                                                                                           |                    |                                       |              |           |         |
| Yes                                                                                                                                                                                                                                  | 17 (1.1)           | 1583                                  | 1.1          | (0.7-1.6) | 0.0060  |
| No                                                                                                                                                                                                                                   | 1396 (0.6)         | 249,914                               | 0.6          | (0.5-0.6) |         |
| <b>Imprisonment</b>                                                                                                                                                                                                                  |                    |                                       |              |           |         |
| Yes                                                                                                                                                                                                                                  | 20 (1.1)           | 1902                                  | 1.1          | (0.7-1.6) | 0.0038  |
| No                                                                                                                                                                                                                                   | 1393 (0.6)         | 249,595                               | 0.6          | (0.5-0.6) |         |
| <b>Substance abuse</b>                                                                                                                                                                                                               |                    |                                       |              |           |         |
| Yes                                                                                                                                                                                                                                  | 128 (1.1)          | 12,137                                | 1.1          | (0.9-1.3) | <0.0001 |
| No                                                                                                                                                                                                                                   | 1285 (0.5)         | 239,360                               | 0.5          | (0.5-0.6) |         |
| <b>Alcohol use disorder</b>                                                                                                                                                                                                          |                    |                                       |              |           |         |
| Yes                                                                                                                                                                                                                                  | 93 (1.3)           | 7212                                  | 1.3          | (1.1-1.6) | <0.0001 |
| No                                                                                                                                                                                                                                   | 1320 (0.5)         | 244,285                               | 0.5          | (0.5-0.6) |         |
| <b>Drug use disorder</b>                                                                                                                                                                                                             |                    |                                       |              |           |         |
| Yes                                                                                                                                                                                                                                  | 52 (0.8)           | 6411                                  | 0.8          | (0.6-1.1) | 0.0066  |
| No                                                                                                                                                                                                                                   | 1361 (0.6)         | 245,086                               | 0.6          | (0.5-0.6) |         |
| <b>Psychiatric admission</b>                                                                                                                                                                                                         |                    |                                       |              |           |         |
| Yes                                                                                                                                                                                                                                  | 13 (1.7)           | 766                                   | 1.7          | (1.0-2.8) | <0.0001 |
| No                                                                                                                                                                                                                                   | 1400 (0.6)         | 250,731                               | 0.6          | (0.5-0.6) |         |
| <b>Severe mental illness</b>                                                                                                                                                                                                         |                    |                                       |              |           |         |
| Yes                                                                                                                                                                                                                                  | 119 (1.1)          | 11,012                                | 1.1          | (0.9-1.3) | <0.0001 |
| No                                                                                                                                                                                                                                   | 1294 (0.5)         | 240,485                               | 0.5          | (0.5-0.6) |         |
| <b>Mental disorder</b>                                                                                                                                                                                                               |                    |                                       |              |           |         |
| Yes                                                                                                                                                                                                                                  | 245 (0.7)          | 33,154                                | 0.7          | (0.7-0.8) | <0.0001 |
| No                                                                                                                                                                                                                                   | 1168 (0.5)         | 218,338                               | 0.5          | (0.5-0.6) |         |
| <b>Chronic medical condition</b>                                                                                                                                                                                                     |                    |                                       |              |           |         |
| Yes                                                                                                                                                                                                                                  | 1265 (1.0)         | 133,299                               | 1.0          | (0.9-1.0) | <0.0001 |
| No                                                                                                                                                                                                                                   | 148 (0.1)          | 118,198                               | 0.1          | (0.1-0.1) |         |
| ICU=intensive care unit, CIF=cumulative incidence function                                                                                                                                                                           |                    |                                       |              |           |         |
| *Results were not presented for crisis shelter and supported psychiatric housing as the cases were too few. <sup>†</sup> “History of homelessness” was used due to too few cases when restricted to “Homelessness during 2018-2020”. |                    |                                       |              |           |         |
| <b>Supplementary table 9: Cumulative incidence of admission to intensive care 14 days after a SARS-CoV-2 infection*</b>                                                                                                              |                    |                                       |              |           |         |

**Supplementary figure 2: Cumulative incidence of hospital admission and intensive care within 14 days after a PCR-confirmed SARS-CoV-2 infection**

**a. Overall**

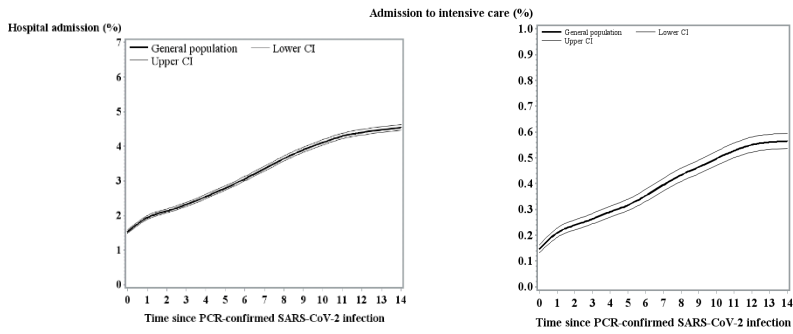

**b. Sex**

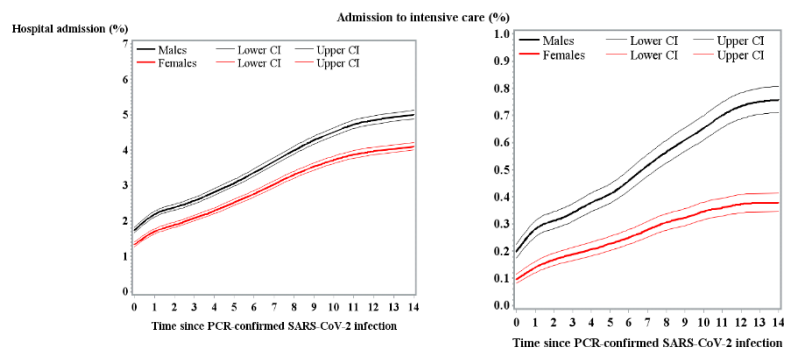

**c. Crisis shelter stay**

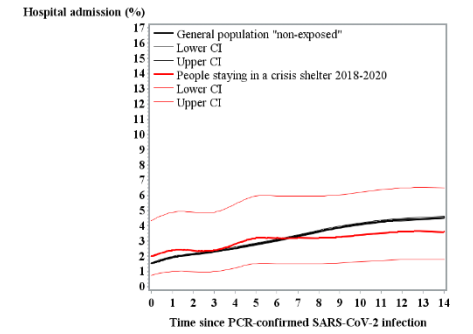

**d. Alcohol use disorder**

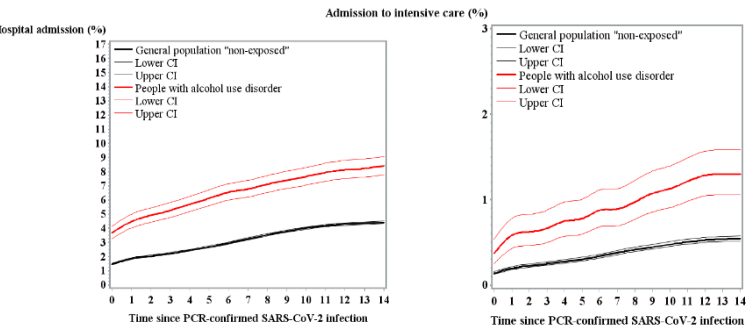

**e. Drug use disorder**

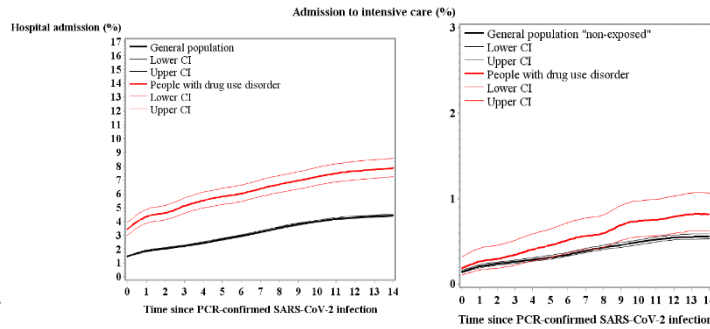

**f. Mental disorder**

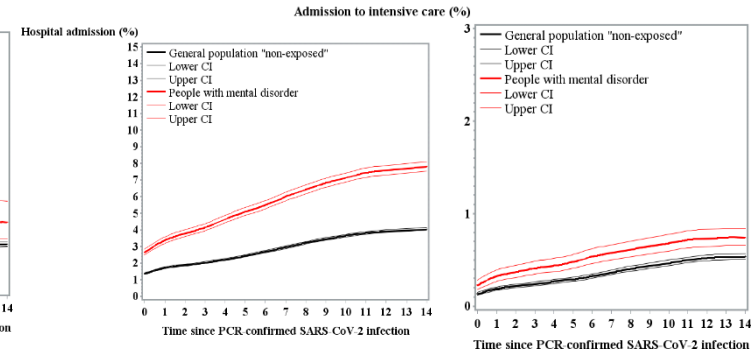

|                                  | ICU admissions | Person-years | IR per 1000 person-years | (95% CI)  | IRR (model 1) <sup>†</sup> | (95% CI)    | P value | IRR (model 2) <sup>‡</sup> | (95% CI)    | P value |
|----------------------------------|----------------|--------------|--------------------------|-----------|----------------------------|-------------|---------|----------------------------|-------------|---------|
| Total                            | 1395           | 10,387       | 134                      | (127-142) |                            |             |         |                            |             |         |
| <b>Sex</b>                       |                |              |                          |           |                            |             |         |                            |             |         |
| Male                             | 921            | 5101         | 181                      | (169-193) | 1.93                       | (1.73-2.16) | <0.0001 | 1.91                       | (1.71-2.13) | <0.0001 |
| Female                           | 474            | 5286         | 90                       | (82-98)   | 1                          |             |         | 1                          |             |         |
| <b>Low educational level</b>     |                |              |                          |           |                            |             |         |                            |             |         |
| Yes                              | 489            | 3227         | 152                      | (139-166) | 1.59                       | (1.42-1.78) | <0.0001 | 1.40                       | (1.25-1.57) | <0.0001 |
| No                               | 906            | 7160         | 127                      | (119-135) | 1                          |             |         | 1                          |             |         |
| <b>Homelessness</b>              |                |              |                          |           |                            |             |         |                            |             |         |
| Yes                              | 5              | 12           | 413                      | (172-991) | 3.12                       | (1.29-7.52) | 0.033   | 2.37                       | (0.98-5.74) | 0.093   |
| No                               | 1390           | 10,375       | 134                      | (127-141) | 1                          |             |         | 1                          |             |         |
| <b>Imprisonment</b>              |                |              |                          |           |                            |             |         |                            |             |         |
| Yes                              | 21             | 79           | 265                      | (165-405) | 2.41                       | (1.56-3.72) | 0.00050 | 2.14                       | (1.38-3.30) | 0.0022  |
| No                               | 1374           | 10,308       | 133                      | (127-141) | 1                          |             |         | 1                          |             |         |
| <b>Substance abuse</b>           |                |              |                          |           |                            |             |         |                            |             |         |
| Yes                              | 126            | 488          | 258                      | (217-307) | 1.32                       | (1.09-1.58) | 0.0048  | 1.45                       | (1.21-1.75) | 0.00020 |
| No                               | 1269           | 9899         | 128                      | (121-135) | 1                          |             |         | 1                          |             |         |
| <b>Alcohol use disorder</b>      |                |              |                          |           |                            |             |         |                            |             |         |
| Yes                              | 91             | 290          | 314                      | (256-386) | 1.46                       | (1.17-1.80) | 0.0011  | 1.67                       | (1.34-2.07) | <0.0001 |
| No                               | 1304           | 10,097       | 129                      | (122-136) | 1                          |             |         | 1                          |             |         |
| <b>Drug use disorder</b>         |                |              |                          |           |                            |             |         |                            |             |         |
| Yes                              | 52             | 258          | 201                      | (154-264) | 1.11                       | (0.84-1.46) | 0.49    | 1.17                       | (0.89-1.55) | 0.28    |
| No                               | 1343           | 10,129       | 133                      | (126-140) | 1                          |             |         | 1                          |             |         |
| <b>Psychiatric admission</b>     |                |              |                          |           |                            |             |         |                            |             |         |
| Yes                              | 13             | 31           | 416                      | (241-716) | 1.99                       | (1.15-3.45) | 0.027   | 2.06                       | (1.19-3.57) | 0.021   |
| No                               | 1382           | 10,356       | 133                      | (127-141) | 1                          |             |         | 1                          |             |         |
| <b>Severe mental illness</b>     |                |              |                          |           |                            |             |         |                            |             |         |
| Yes                              | 118            | 444          | 266                      | (222-318) | 1.52                       | (1.26-1.84) | <0.0001 | 1.48                       | (1.22-1.79) | 0.00010 |
| No                               | 1277           | 9943         | 128                      | (122-136) | 1                          |             |         | 1                          |             |         |
| <b>Mental disorder</b>           |                |              |                          |           |                            |             |         |                            |             |         |
| Yes                              | 241            | 1360         | 177                      | (56-201)  | 1.12                       | (1.06-1.40) | 0.0078  | 1.18                       | (1.02-1.36) | 0.025   |
| No                               | 1154           | 9029         | 128                      | (121-135) | 1                          |             |         | 1                          |             |         |
| <b>Chronic medical condition</b> |                |              |                          |           |                            |             |         |                            |             |         |
| Yes                              | 1120           | 4330         | 259                      | (244-274) | 1.88                       | (1.63-2.18) | <0.0001 | 1.83                       | (1.58-2.11) | <0.0001 |
| No                               | 275            | 6057         | 45                       | (40-51)   | 1                          |             |         | 1                          |             |         |

ICU=intensive care unit, IR=incidence ratio, IRR=incidence rate ratio  
\*Analysis not presented for women's shelter stay and supported psychiatric housing due to too few cases. <sup>†</sup>Model 1 is adjusted for age (5-year age groups), calendar time (months), and sex. <sup>‡</sup>Model 2 is additionally adjusted for country of origin, area of living, and vaccination status.

**Supplementary table 10: Risk of intensive care within 14 days after a PCR-confirmed SARS-CoV-2 infection\***

|                                      | Deaths (%) | Individuals with SARS-CoV-2 infection | CIF % Day 60 | 95% CI     | P-value |
|--------------------------------------|------------|---------------------------------------|--------------|------------|---------|
| The Danish general population        | 2864 (1.1) | 251,570                               | 1.2          | (1.1-1.2)  |         |
| <b>Sex</b>                           |            |                                       |              |            |         |
| Male                                 | 1569 (1.3) | 123,551                               | 1.3          | (1.2-1.4)  | <0.0001 |
| Female                               | 1295 (1.0) | 128,019                               | 1.0          | (1.0-1.1)  |         |
| <b>Low educational level</b>         |            |                                       |              |            |         |
| Yes                                  | 1242 (1.7) | 74,382                                | 1.7          | (1.6-1.8)  | <00001  |
| No                                   | 1622 (0.9) | 177,188                               | 0.9          | (0.9-1.0)  |         |
| <b>Homelessness</b>                  |            |                                       |              |            |         |
| Yes                                  | 6 (2.2)    | 278                                   | 2.2          | (0.9-4.5)  | 0.11    |
| No                                   | 2858 (1.1) | 251,292                               | 1.2          | (1.1-1.2)  |         |
| <b>History of homelessness*</b>      |            |                                       |              |            |         |
| Yes                                  | 27 (1.7)   | 1585                                  | 1.8          | (1.2-2.5)  | 0.030   |
| No                                   | 2837 (1.1) | 249,985                               | 1.2          | (1.1-1.2)  |         |
| <b>Imprisonment</b>                  |            |                                       |              |            |         |
| Yes                                  | 17 (0.9)   | 1905                                  | 1.1          | (0.8-1.4)  | 0.3     |
| No                                   | 2847 (1.1) | 249,665                               | 1.2          | (1.1-1.2)  |         |
| <b>Substance abuse</b>               |            |                                       |              |            |         |
| Yes                                  | 346 (2.9)  | 12,154                                | 2.9          | (2.6-3.2)  | <0.0001 |
| No                                   | 2518 (1.1) | 239,416                               | 1.1          | (1.0-1.1)  |         |
| <b>Alcohol use disorder</b>          |            |                                       |              |            |         |
| Yes                                  | 242 (3.4)  | 7223                                  | 3.4          | (3.0-3.9)  | <0.0001 |
| No                                   | 2622 (1.1) | 244,347                               | 1.1          | (1.1-1.1)  |         |
| <b>Drug use disorder</b>             |            |                                       |              |            |         |
| Yes                                  | 152 (2.4)  | 6421                                  | 2.4          | (2.1-2.8)  | <0.0001 |
| No                                   | 2712 (1.1) | 245,149                               | 1.1          | (1.1-1.2)  |         |
| <b>Supported psychiatric housing</b> |            |                                       |              |            |         |
| Yes                                  | 11 (2.6)   | 428                                   | 2.6          | (1.4-4.5)  | 0.0050  |
| No                                   | 2853 (1.1) | 251,142                               | 1.2          | (1.1-1.2)  |         |
| <b>Psychiatric admission</b>         |            |                                       |              |            |         |
| Yes                                  | 75 (9.8)   | 767                                   | 9.9          | (7.9-12.2) | <0.0001 |
| No                                   | 2789 (1.1) | 250,803                               | 1.1          | (1.1-1.2)  |         |
| <b>Severe mental illness</b>         |            |                                       |              |            |         |
| Yes                                  | 354 (3.2)  | 11,019                                | 3.3          | (3.0-3.6)  | <0.0001 |
| No                                   | 2510 (1.0) | 240,551                               | 1.1          | (1.0-1.1)  |         |
| <b>Mental disorder</b>               |            |                                       |              |            |         |
| Yes                                  | 932 (2.8)  | 33,175                                | 2.9          | (2.7-3.0)  | <0.0001 |
| No                                   | 1932 (0.9) | 218,395                               | 0.9          | (0.9-0.9)  |         |
| <b>Chronic medical condition</b>     |            |                                       |              |            |         |
| Yes                                  | 2796 (2.1) | 133,366                               | 2.1          | (2.1-2.2)  | <0.0001 |
| No                                   | 68 (0.1)   | 118,204                               | 0.1          | (0.0-0.1)  |         |

CIF=cumulative incidence function.  
\*“History of homelessness” was used in the corresponding figure (Figure 2) due to few cases when restricted to “experiencing homelessness during 2018-2020”

**Supplementary table 11: Cumulative incidence of death within 60 days after a PCR-confirmed SARS-CoV-2 infection**



**Supplementary figure 3: Cumulative incidence of death within 60 days after a PCR-confirmed SARS-CoV-2 infection**

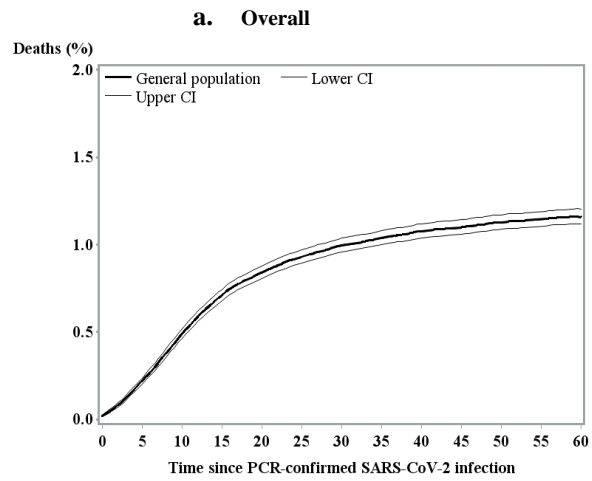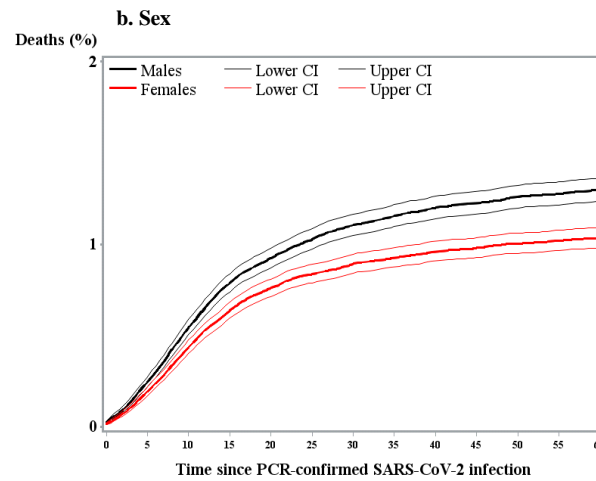

**c. Alcohol use disorder**

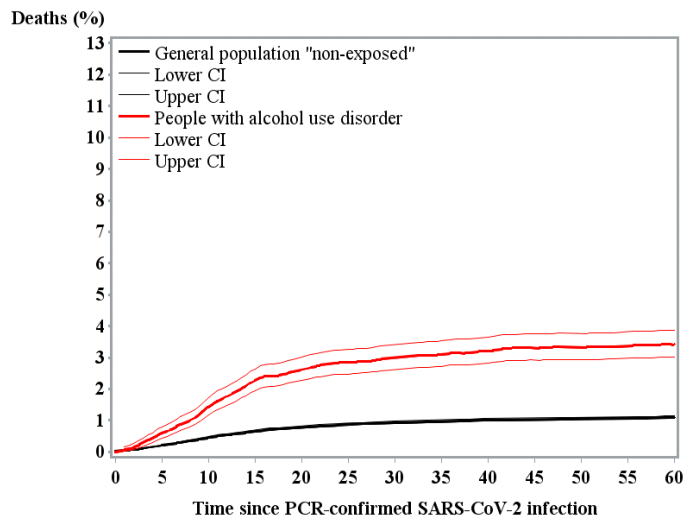

**d. Drug use disorder**

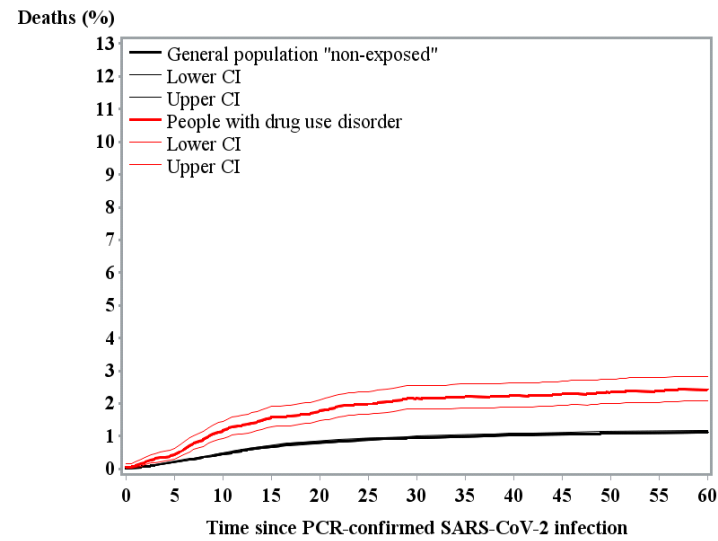

**e. Mental disorder**

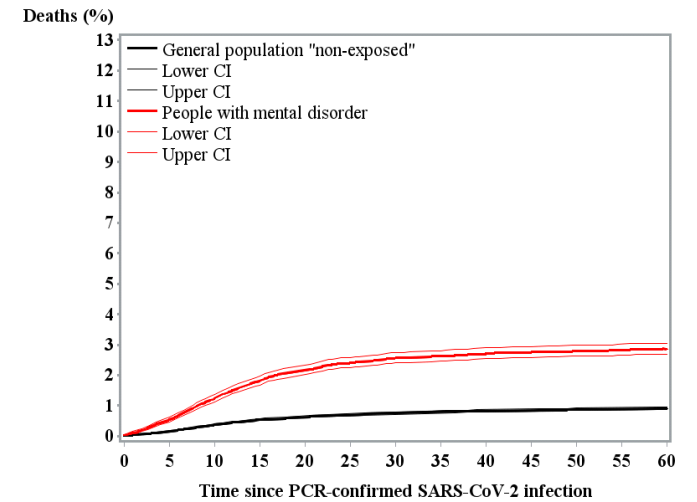

|                                      | Deaths<br>within 60<br>days | Person-<br>years | MR per 1000<br>person-years | (95% CI)   | MRR<br>(model 1)* | (95% CI)     | P value | MRR (model 2)† | (95% CI)     | P value |
|--------------------------------------|-----------------------------|------------------|-----------------------------|------------|-------------------|--------------|---------|----------------|--------------|---------|
| <b>Total</b>                         | 2863                        | 40,446           | 71                          | (68-73)    |                   |              |         |                |              |         |
| <b>Low educational level</b>         |                             |                  |                             |            |                   |              |         |                |              |         |
| Yes                                  | 1242                        | 12,563           | 99                          | (94-105)   | 1.34              | (1.24-1.45)  | <0.0001 | 1.38           | (1.27-1.49)  | <0.0001 |
| No                                   | 1621                        | 27,883           | 58                          | (55-61)    | 1                 |              |         | 1              |              |         |
| <b>Homelessness</b>                  |                             |                  |                             |            |                   |              |         |                |              |         |
| Yes                                  | 6                           | 47               | 128                         | (58-286)   | 8.17              | (3.66-18.25) | 0.00013 | 7.65           | (3.41-17.13) | 0.00019 |
| No                                   | 2857                        | 40,399           | 71                          | (68-73)    | 1                 |              |         | 1              |              |         |
| <b>Imprisonment</b>                  |                             |                  |                             |            |                   |              |         |                |              |         |
| Yes                                  | 17                          | 306              | 56                          | (35-89)    | 3.12              | (1.93-5.03)  | <0.0001 | 3.08           | (1.90-4.98)  | 0.00010 |
| No                                   | 2846                        | 40,140           | 71                          | (68-74)    | 1                 |              |         | 1              |              |         |
| <b>Substance abuse</b>               |                             |                  |                             |            |                   |              |         |                |              |         |
| Yes                                  | 346                         | 1873             | 185                         | (166-205)  | 2.10              | (1.88-2.36)  | <0.0001 | 2.05           | (1.83-2.30)  | <0.0001 |
| No                                   | 2517                        | 38,574           | 65                          | (63-68)    | 1                 |              |         | 1              |              |         |
| <b>Alcohol use disorder</b>          |                             |                  |                             |            |                   |              |         |                |              |         |
| Yes                                  | 242                         | 1114             | 217                         | (191-246)  | 2.20              | (1.92-2.51)  | <0.0001 | 2.13           | (1.86-2.43)  | <0.0001 |
| No                                   | 2621                        | 39,332           | 67                          | (64-69)    | 1                 |              |         | 1              |              |         |
| <b>Drug use disorder</b>             |                             |                  |                             |            |                   |              |         |                |              |         |
| Yes                                  | 152                         | 988              | 154                         | (131-180)  | 2.00              | (1.69-2.35)  | <0.0001 | 1.95           | (1.65-2.30)  | <0.0001 |
| No                                   | 2711                        | 39,459           | 69                          | (66-71)    | 1                 |              |         | 1              |              |         |
| <b>Supported psychiatric housing</b> |                             |                  |                             |            |                   |              |         |                |              |         |
| Yes                                  | 11                          | 68               | 163                         | (90-294)   | 2.88              | (1.59-5.21)  | 0.0029  | 2.50           | (1.38-4.53)  | 0.0086  |
| No                                   | 2852                        | 40,379           | 71                          | (68-73)    | 1                 |              |         | 1              |              |         |
| <b>Psychiatric admission</b>         |                             |                  |                             |            |                   |              |         |                |              |         |
| Yes                                  | 75                          | 115              | 655                         | (522-821)  | 1.76              | (1.40-2.22)  | <0.0001 | 1.74           | (1.38-2.20)  | <0.0001 |
| No                                   | 2788                        | 40,332           | 69                          | (67-72)    | 1                 |              |         | 1              |              |         |
| <b>Severe mental illness</b>         |                             |                  |                             |            |                   |              |         |                |              |         |
| Yes                                  | 354                         | 1699             | 208                         | (188-231)  | 1.66              | (1.49-1.86)  | <0.0001 | 1.63           | (1.46-1.83)  | <0.0001 |
| No                                   | 2509                        | 38,747           | 65                          | (62-67)    | 1                 |              |         | 1              |              |         |
| <b>Mental disorder</b>               |                             |                  |                             |            |                   |              |         |                |              |         |
| Yes                                  | 932                         | 5219             | 179                         | (167-190)  | 1.93              | (1.78-2.09)  | <0.0001 | 1.91           | (1.76-2.07)  | <0.0001 |
| No                                   | 1931                        | 35,227           | 55                          | (52-57)    | 1                 |              |         | 1              |              |         |
| <b>Chronic medical condition</b>     |                             |                  |                             |            |                   |              |         |                |              |         |
| Yes                                  | 2611                        | 16,741           | 156                         | (150-162)  | 1.60              | (1.3-1.8)    | <0.0001 | 1.61           | (1.41-1.85)  | <0.0001 |
| No                                   | 252                         | 23,705           | 11                          | (9.4-12.0) | 1                 |              |         | 1              |              |         |

MR=mortality rate, MRR=mortality rate ratio  
\*Model 1 is adjusted for age (5-years age groups), calendar time (months), and sex. †Model 2 is additionally adjusted for country of origin, area of living, and vaccination status.

**Supplementary table 12: Risk of death within 60 days after a PCR-confirmed SARS-CoV-2 infection**

|                                                  | Deaths within 60 days | Person-years | Adjusted MRR* | (95% CI)     | P value for the interaction** |
|--------------------------------------------------|-----------------------|--------------|---------------|--------------|-------------------------------|
| Total                                            | 2863                  | 40,446       |               |              |                               |
| <b>Sex</b>                                       |                       |              |               |              |                               |
| Male                                             | 1568                  | 19,892       | 1.77          | (1.64-1.90)  |                               |
| Female                                           | 1295                  | 20,554       | 1             |              |                               |
| <b>Educational level*sex</b>                     |                       |              |               |              |                               |
| <b>Low educational level males</b>               |                       |              |               |              | 0.37                          |
| Yes                                              | 571                   | 6484         | 1.33          | (1.20-1.48)  |                               |
| No                                               | 997                   | 13,409       | 1             |              |                               |
| <b>Low educational level females</b>             |                       |              |               |              |                               |
| Yes                                              | 671                   | 6080         | 1.43          | (1.28-1.60)  |                               |
| No                                               | 624                   | 14,475       | 1             |              |                               |
| <b>Homelessness*sex</b>                          |                       |              |               |              |                               |
| <b>Homelessness in males†</b>                    |                       |              |               |              | 0.18                          |
| Yes                                              | 19                    | 126          | 3.10          | (1.97-4.90)  |                               |
| No                                               | 1549                  | 19,767       | 1             |              |                               |
| <b>Homelessness in females†</b>                  |                       |              |               |              |                               |
| Yes                                              | 8                     | 122          | 5.60          | (2.78-11.30) |                               |
| No                                               | 1287                  | 20,432       | 1             |              |                               |
| <b>Imprisonment*sex</b>                          |                       |              |               |              |                               |
| <b>Imprisonment in males‡</b>                    |                       |              |               |              |                               |
| Yes                                              | ...                   | ...          | ...           |              |                               |
| No                                               | ...                   | ...          | ...           |              |                               |
| <b>Imprisonment in females‡</b>                  |                       |              |               |              |                               |
| Yes                                              | ...                   | ...          | ...           |              |                               |
| No                                               | ...                   | ...          | ...           |              |                               |
| <b>Substance abuse*sex</b>                       |                       |              |               |              | 0.28                          |
| <b>Substance abuse in males</b>                  |                       |              |               |              |                               |
| Yes                                              | 234                   | 1080         | 2.15          | (1.87-2.47)  |                               |
| No                                               | 1334                  | 18,813       | 1             |              |                               |
| <b>Substance abuse in females</b>                |                       |              |               |              |                               |
| Yes                                              | 112                   | 793          | 1.88          | (1.55-2.29)  |                               |
| No                                               | 1183                  | 19,761       | 1             |              |                               |
| <b>Supported psychiatric housing*sex</b>         |                       |              |               |              |                               |
| <b>Supported psychiatric housing in males‡</b>   |                       |              |               |              |                               |
| Yes                                              | ...                   | ...          | ...           |              |                               |
| No                                               | ...                   | ...          | ...           |              |                               |
| <b>Supported psychiatric housing in females‡</b> |                       |              |               |              |                               |
| Yes                                              | ...                   | ...          | ...           |              |                               |
| No                                               | ...                   | ...          | ...           |              |                               |
| <b>Psychiatric admission*sex</b>                 |                       |              |               |              |                               |
| <b>Psychiatric admission in males</b>            |                       |              |               |              | 0.22                          |
| Yes                                              | 38                    | 49           | 2.03          | (1.46-2.81)  |                               |
| No                                               | 1530                  | 19,843       | 1             |              |                               |
| <b>Psychiatric admission in females</b>          |                       |              |               |              |                               |
| Yes                                              | 37                    | 66           | 1.52          | (1.09-2.11)  |                               |
| No                                               | 1258                  | 20,489       | 1             |              |                               |
| <b>Severe mental illness*sex</b>                 |                       |              |               |              |                               |
| <b>Severe mental illness in males</b>            |                       |              |               |              | 0.075                         |
| Yes                                              | 151                   | 572          | 1.84          | (1.55-2.18)  |                               |
| No                                               | 1417                  | 19,320       | 1             |              |                               |

|                                                                                                                                                                                                                                                                                                      |      |        |      |             |      |
|------------------------------------------------------------------------------------------------------------------------------------------------------------------------------------------------------------------------------------------------------------------------------------------------------|------|--------|------|-------------|------|
| <b>Severe mental illness in females</b>                                                                                                                                                                                                                                                              |      |        |      |             |      |
| Yes                                                                                                                                                                                                                                                                                                  | 203  | 1127   | 1.50 | (1.29-1.74) |      |
| No                                                                                                                                                                                                                                                                                                   | 1092 | 19,427 | 1    |             |      |
| <b>Chronic medical condition*sex</b>                                                                                                                                                                                                                                                                 |      |        |      |             |      |
| <b>Chronic medical condition in males</b>                                                                                                                                                                                                                                                            |      |        |      |             |      |
| Yes                                                                                                                                                                                                                                                                                                  | 1425 | 7628   | 1.74 | (1.46-2.08) | 0.18 |
| No                                                                                                                                                                                                                                                                                                   | 143  | 12,263 | 1    |             |      |
| <b>Chronic medical condition in females</b>                                                                                                                                                                                                                                                          |      |        |      |             |      |
| Yes                                                                                                                                                                                                                                                                                                  | 1186 | 9113   | 1.46 | (1.19-1.78) |      |
| No                                                                                                                                                                                                                                                                                                   | 109  | 11,441 | 1    |             |      |
| MRR=mortality rate ratio                                                                                                                                                                                                                                                                             |      |        |      |             |      |
| *Adjusted for age (5-years age groups), calendar time (months), country of origin, area of living, and vaccination status. **Interaction analysis of sex*each population group. †Any history of homelessness used for the interaction analysis to have enough cases. ‡Too few cases to be presented. |      |        |      |             |      |
| <b>Supplementary table 13: Risk of death within 60 days after a PCR-confirmed SARS-CoV-2 infection by population group and by sex</b>                                                                                                                                                                |      |        |      |             |      |

|                                                          | Deaths within 60 days | Person-years | Adjusted MRR* | (95% CI)     | RERI† | (95% CI)       |
|----------------------------------------------------------|-----------------------|--------------|---------------|--------------|-------|----------------|
| Total                                                    | 2863                  | 40,446       |               |              |       |                |
| <b>Low educational level</b>                             |                       |              |               |              |       |                |
| Male with low educational level                          | 571                   | 6484         | 2.52          | (2.24-2.83)  | 0.20  | (-0.070-0.47)  |
| Female with low educational level                        | 671                   | 6080         | 1.43          | (1.28-1.60)  |       |                |
| Male with high educational level                         | 997                   | 13409        | 1.89          | (1.71-2.09)  |       |                |
| Female with high educational level (reference)           | 624                   | 14475        | 1             |              |       |                |
| <b>Experience of homelessness‡</b>                       |                       |              |               |              |       |                |
| Male with experiences of homelessness                    | 19                    | 126          | 5.47          | (3.46-8.65)  | -0.89 | (-5.50-3.72)   |
| Female with experiences of homelessness                  | 8                     | 122          | 5.60          | (2.78-11.30) |       |                |
| Male with experiences of homelessness                    | 1549                  | 19,767       | 1.76          | (1.63-1.90)  |       |                |
| Female without experiences of homelessness (reference)   | 1287                  | 20,432       | 1             |              |       |                |
| <b>Experience of imprisonment¶</b>                       |                       |              |               |              |       |                |
| Male with experiences of imprisonment                    | ...                   | ...          | ...           |              |       |                |
| Female with experiences of imprisonment                  | ...                   | ...          | ...           |              |       |                |
| Male with experiences of imprisonment                    | ...                   | ...          | ...           |              |       |                |
| Female without experiences of imprisonment (reference)   | ...                   | ...          | ...           |              |       |                |
| <b>Substance abuse</b>                                   |                       |              |               |              |       |                |
| Male with substance abuse                                | 234                   | 1080         | 3.65          | (3.16-4.21)  | 1.07  | (0.48-1.66)**  |
| Female with substance abuse                              | 112                   | 793          | 1.88          | (1.55-2.29)  |       |                |
| Male without substance abuse                             | 1334                  | 18,813       | 1.70          | (1.56-1.84)  |       |                |
| Female without substance abuse (reference)               | 1183                  | 19,761       | 1             |              |       |                |
| <b>Supported psychiatric housing¶</b>                    |                       |              |               |              |       |                |
| Male with supported psychiatric housing                  | ...                   | ...          | ...           |              |       |                |
| Female with supported psychiatric housing                | ...                   | ...          | ...           |              |       |                |
| Male without supported psychiatric housing               | ...                   | ...          | ...           |              |       |                |
| Female without supported psychiatric housing (reference) | ...                   | ...          | ...           |              |       |                |
| <b>Psychiatric admission</b>                             |                       |              |               |              |       |                |
| Male with psychiatric admission                          | 38                    | 49           | 3.55          | (2.57-4.91)  | 1.28  | (0.035-2.52)** |
| Female with psychiatric admission                        | 37                    | 66           | 1.52          | (1.09-2.11)  |       |                |
| Male without psychiatric admission                       | 1530                  | 19,843       | 1.75          | (1.62-1.89)  |       |                |
| Female without psychiatric admission (reference)         | 1258                  | 20,489       | 1             |              |       |                |
| <b>Severe mental illness</b>                             |                       |              |               |              |       |                |
| Male with severe mental illness                          | 151                   | 572          | 3.26          | (2.75-3.87)  | 0.99  | (0.42-1.56)**  |
| Female with severe mental illness                        | 203                   | 1127         | 1.50          | (1.29-1.74)  |       |                |
| Male without severe mental illness                       | 1417                  | 19,320       | 1.77          | (1.64-1.92)  |       |                |
| Female without severe mental illness (reference)         | 1092                  | 19,427       | 1             |              |       |                |
| <b>Chronic medical condition</b>                         |                       |              |               |              |       |                |
| Male with chronic medical condition                      | 1425                  | 7628         | 2.62          | (2.15-3.20)  | 0.65  | (0.35-0.97)**  |
| Female with chronic medical condition                    | 1186                  | 9113         | 1.46          | (1.19-1.78)  |       |                |
| Male without chronic medical condition                   | 143                   | 12,264       | 1.51          | (1.17-1.94)  |       |                |
| Female without chronic medical condition (reference)     | 109                   | 11,441       | 1             |              |       |                |

IRR=incidence rate ratio, RERI=Relative Excess Risk due to Interaction  
\*Adjusted for age (5-years age groups), calendar time (months), country of origin, area of living, and vaccination status. \*\*Statistically significant interaction.  
†RERI indicates whether the effect of the specific exposure on outcome would be greater in males than in females (reference group) with 95% CI calculated.  
For CIs not including 0, RERI was statistically significant. ‡"History of homelessness" was used due to too few cases when restricted to "Homelessness during 2018-2020". ¶Too few cases in some strata to present the results.

**Supplementary table 14. Analysis of effect modification of exposures on death by sex among people with PCR-confirmed SARS-CoV-2 infection**

|                                                                                                                                                                                      | Deaths | Person-years | MRR (model 1)* | (95% CI)      | P value | MRR (model 2)† | (95% CI)      | P value |
|--------------------------------------------------------------------------------------------------------------------------------------------------------------------------------------|--------|--------------|----------------|---------------|---------|----------------|---------------|---------|
| Total                                                                                                                                                                                | 82,171 | 7,007,288    |                |               |         |                |               |         |
| <b>Low educational level</b>                                                                                                                                                         |        |              |                |               |         |                |               |         |
| Both                                                                                                                                                                                 | 1706   | 51,086       | 5.72           | (5.45-6.01)   | <0.0001 | 5.72           | (5.45-6.01)   | <0.0001 |
| Only low educational level                                                                                                                                                           | 34,649 | 1,911,233    | 1.36           | (1.34-1.38)   |         | 1.37           | (1.34-1.39)   |         |
| Only PCR-confirmed SARS-CoV-2 infection                                                                                                                                              | 2302   | 121,404      | 3.84           | (3.68-4.01)   |         | 3.81           | (3.65-3.97)   |         |
| None                                                                                                                                                                                 | 43,514 | 4,923,566    | 1              |               |         | 1              |               |         |
| <b>Experience of homelessness and SARS-CoV-2 infection</b>                                                                                                                           |        |              |                |               |         |                |               |         |
| Both                                                                                                                                                                                 | 15     | 183          | 39.21          | (23.63-65.06) | <0.0001 | 41.24          | (24.84-68.44) | <0.0001 |
| Only homelessness                                                                                                                                                                    | 298    | 10,514       | 8.82           | (7.87-9.89)   |         | 8.85           | (7.90-9.92)   |         |
| Only PCR-confirmed SARS-CoV-2 infection                                                                                                                                              | 3993   | 172,306      | 3.97           | (3.85-4.10)   |         | 3.97           | (3.85-4.11)   |         |
| None                                                                                                                                                                                 | 77,865 | 6,824,284    | 1              |               |         | 1              |               |         |
| <b>Experience of imprisonment and SARS-CoV-2 infection</b>                                                                                                                           |        |              |                |               |         |                |               |         |
| Both                                                                                                                                                                                 | 26     | 1187         | 9.44           | (6.43-13.88)  | <0.0001 | 9.66           | (6.57-14.20)  | <0.0001 |
| Only imprisonment                                                                                                                                                                    | 855    | 58433        | 4.05           | (3.78-4.34)   |         | 4.03           | (3.77-4.32)   |         |
| Only PCR-confirmed SARS-CoV-2 infection                                                                                                                                              | 3982   | 171302       | 4.00           | (3.87-4.13)   |         | 4.00           | (3.87-4.13)   |         |
| None                                                                                                                                                                                 | 77308  | 6776366      | 1              |               |         | 1              |               |         |
| <b>Substance abuse and SARS-CoV-2 infection</b>                                                                                                                                      |        |              |                |               |         |                |               |         |
| Both                                                                                                                                                                                 | 512    | 7831         | 10.43          | (9.56-11.38)  | <0.0001 | 10.55          | (9.67-11.51)  | <0.0001 |
| Only pre-existing substance abuse                                                                                                                                                    | 12,685 | 490,288      | 3.27           | (3.21-3.34)   |         | 3.28           | (3.22-3.35)   |         |
| Only PCR-confirmed SARS-CoV-2 infection                                                                                                                                              | 3496   | 164659       | 4.13           | (3.99-4.28)   |         | 4.16           | (4.02-4.31)   |         |
| None                                                                                                                                                                                 | 65478  | 6344511      | 1              |               |         | 1              |               |         |
| <b>Supported psychiatric housing and SARS-CoV-2 infection</b>                                                                                                                        |        |              |                |               |         |                |               |         |
| Both                                                                                                                                                                                 | 17     | 296          | 12.14          | (7.54-19.52)  | <0.0001 | 11.95          | (7.42-19.22)  | <0.0001 |
| Only supported psychiatric housing                                                                                                                                                   | 250    | 14,495       | 4.37           | (3.86-4.95)   |         | 4.40           | (3.89-4.99)   |         |
| Only PCR-confirmed SARS-CoV-2 infection                                                                                                                                              | 3991   | 172,193      | 3.97           | (3.84-4.10)   |         | 3.97           | (3.84-4.10)   |         |
| None                                                                                                                                                                                 | 77,913 | 6,820,304    | 1              |               |         | 1              |               |         |
| <b>Psychiatric admission and SARS-CoV-2 infection</b>                                                                                                                                |        |              |                |               |         |                |               |         |
| Both                                                                                                                                                                                 | 100    | 473          | 8.71           | (7.16-10.60)  | <0.0001 | 8.65           | (7.11-10.53)  | <0.0001 |
| Only psychiatric admission                                                                                                                                                           | 1623   | 21,061       | 3.29           | (3.14-3.46)   |         | 3.30           | (3.14-3.46)   |         |
| Only PCR-confirmed SARS-CoV-2 infection                                                                                                                                              | 3908   | 172,016      | 3.96           | (3.84-4.09)   |         | 3.96           | (3.83-4.09)   |         |
| None                                                                                                                                                                                 | 76,540 | 6,813,738    | 1              |               |         | 1              |               |         |
| <b>Severe mental illness and SARS-CoV-2 infection</b>                                                                                                                                |        |              |                |               |         |                |               |         |
| Both                                                                                                                                                                                 | 515    | 7340         | 7.77           | (7.12-8.48)   | <0.0001 | 7.82           | (7.16-8.53)   | <0.0001 |
| Only pre-existing mental disorder                                                                                                                                                    | 8762   | 368,407      | 2.15           | (2.10-2.20)   |         | 2.15           | (2.11-2.20)   |         |
| Only PCR-confirmed SARS-CoV-2 infection                                                                                                                                              | 3493   | 165,150      | 3.95           | (3.82-4.09)   |         | 3.96           | (3.82-4.10)   |         |
| None                                                                                                                                                                                 | 69,401 | 6,466,391    | 1              |               |         | 1              |               |         |
| <b>Chronic medical condition and SARS-CoV-2 infection</b>                                                                                                                            |        |              |                |               |         |                |               |         |
| Both                                                                                                                                                                                 | 3630   | 74,014       | 7.19           | (6.91-7.48)   | <0.0001 | 7.23           | (6.95-7.52)   | <0.0001 |
| Only chronic medical condition                                                                                                                                                       | 69,210 | 3,454,313    | 1.75           | (1.71-1.79)   |         | 1.76           | (1.72-1.80)   |         |
| Only PCR-confirmed SARS-CoV-2 infection                                                                                                                                              | 378    | 98,476       | 2.75           | (2.48-3.05)   |         | 2.73           | (2.46-3.03)   |         |
| None                                                                                                                                                                                 | 8953   | 3,380,486    | 1              |               |         | 1              |               |         |
| MRR=mortality rate ratio                                                                                                                                                             |        |              |                |               |         |                |               |         |
| *Model 1 is adjusted for age (5-years age groups), calendar time (months), and sex. †Model 2 is additionally adjusted for country of origin, area of living, and vaccination status. |        |              |                |               |         |                |               |         |
| <b>Supplementary table 15: Risk of death during the entire study period</b>                                                                                                          |        |              |                |               |         |                |               |         |

**Supplementary figure 4: Risk of all-cause mortality associated with a PCR-confirmed SARS-CoV-2 infection in the population groups and their comparison groups\***

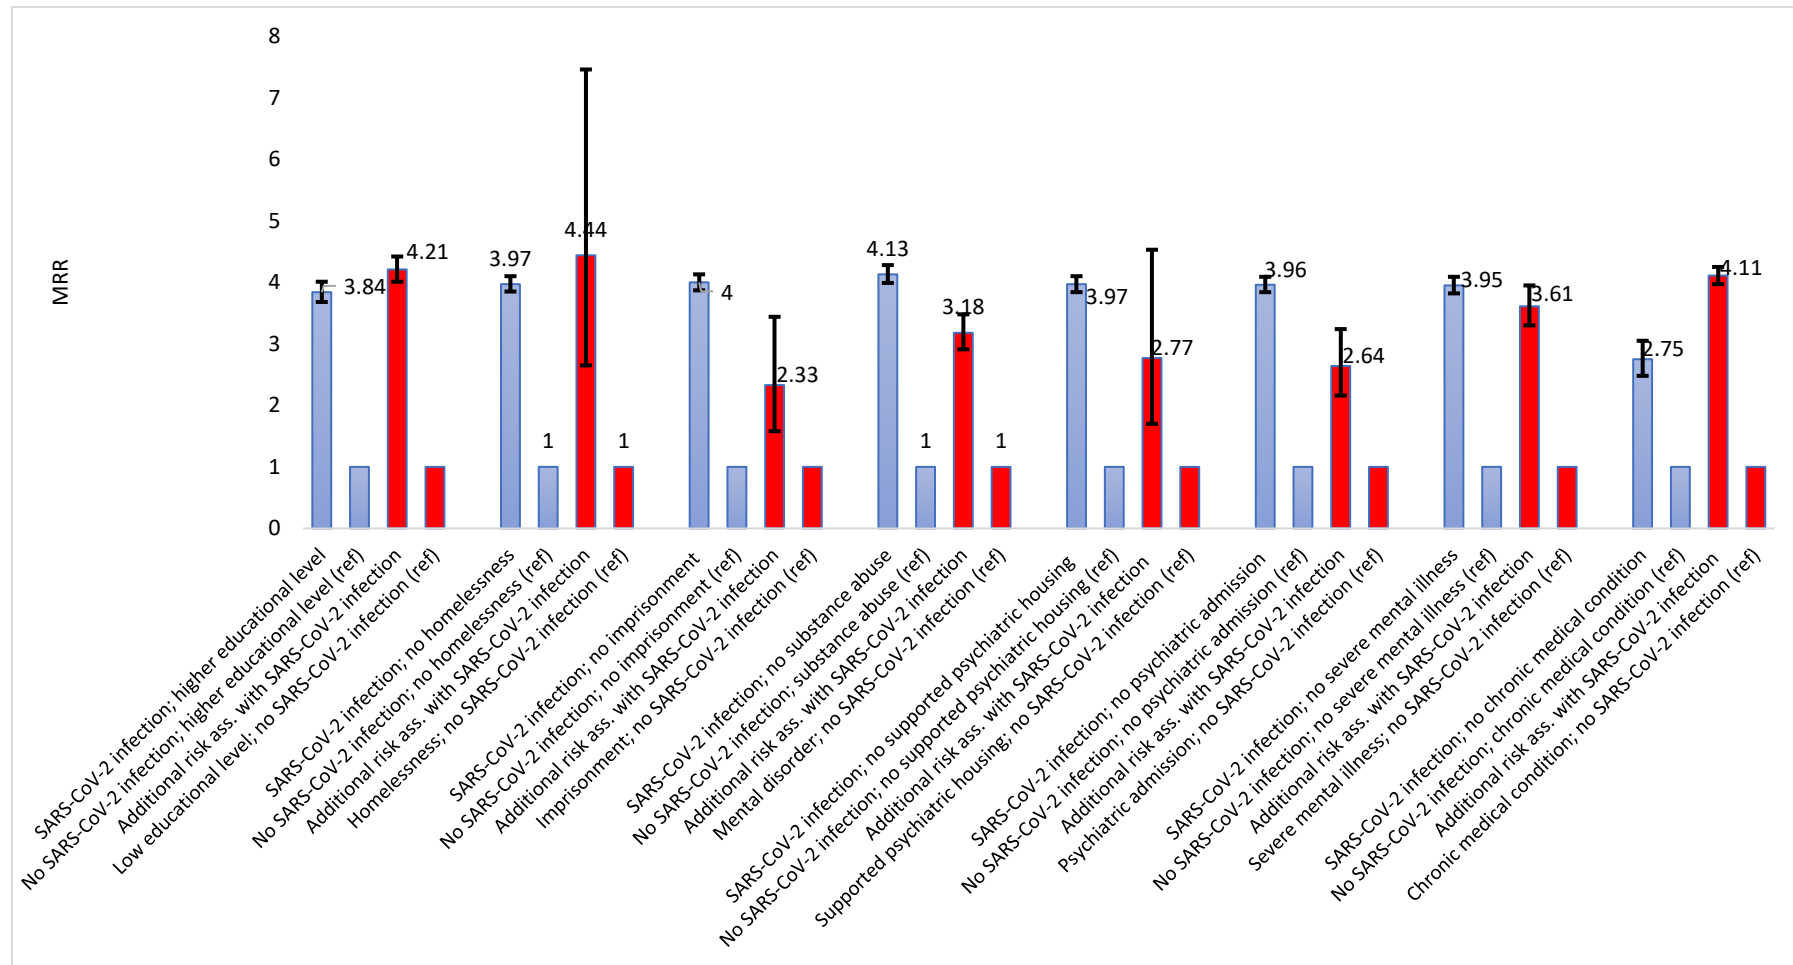

\*Estimates are adjusted for 5-years age groups, month, and sex. P-values <0.0001 and <0.05 after adjusting for multiple testing with Bonferroni. Additional risk associated with SARS-CoV-2 infection refers to the extra relative risk that multiplied with the pre-existing excess risk of death in the selected population groups (second bar for each predictor in figure 3) gives the overall combined excess risk of death (first bar for each predictor in figure 3) during the study period.

|                                                                                             | <b>SARS-CoV-2 infections (%)</b> | <b>Individuals for analysis</b> | <b>CIF % (Oct 15, 2021)</b> | <b>95% CI</b> | <b>P-value</b> |
|---------------------------------------------------------------------------------------------|----------------------------------|---------------------------------|-----------------------------|---------------|----------------|
| The Danish general population                                                               | 251,569 (5.8)                    | 4,308,735                       | 5.8                         | (5.8-5.9)     |                |
| <b>Sex</b>                                                                                  |                                  |                                 |                             |               |                |
| Male                                                                                        | 123,551 (5.8)                    | 2,126,574                       | 5.8                         | (5.8-5.8)     | 0.0084         |
| Female                                                                                      | 128,018 (5.9)                    | 2,182,161                       | 5.9                         | (5.8-5.9)     |                |
| <b>Low educational level</b>                                                                |                                  |                                 |                             |               |                |
| Yes                                                                                         | 74,382 (6.3)                     | 1,173,496                       | 6.3                         | (6.3-6.4)     | <0.0001        |
| No                                                                                          | 177,187 (5.7)                    | 3,135,239                       | 5.7                         | (5.6-5.7)     |                |
| <b>Experiences of homelessness</b>                                                          |                                  |                                 |                             |               |                |
| Yes                                                                                         | 278 (4.4)                        | 6375                            | 4.4                         | (3.9-4.9)     | <0.0001        |
| No                                                                                          | 251,291 (5.8)                    | 4,302,360                       | 5.8                         | (5.8-5.9)     |                |
| <b>Crisis shelter use</b>                                                                   |                                  |                                 |                             |               |                |
| Yes                                                                                         | 250 (9.5)                        | 2638                            | 5.9                         | (8.4-10.6)    | <0.0001        |
| No                                                                                          | 251,319 (5.8)                    | 4,306,097                       | 5.8                         | (5.8-5.9)     |                |
| <b>Imprisonment</b>                                                                         |                                  |                                 |                             |               |                |
| Yes                                                                                         | 1905 (5.3)                       | 36,271                          | 5.3                         | (5.0-5.5)     | <0.0001        |
| No                                                                                          | 249,664 (5.8)                    | 4,272,464                       | 5.8                         | (5.98-5.9)    |                |
| <b>Supported psychiatric housing</b>                                                        |                                  |                                 |                             |               |                |
| Yes                                                                                         | 428 (4.7)                        | 9142                            | 4.7                         | (4.3-5.1)     | <0.0001        |
| No                                                                                          | 251,141 (5.8)                    | 4,299,593                       | 5.8                         | (5.8-5.9)     |                |
| <b>Psychiatric admission</b>                                                                |                                  |                                 |                             |               |                |
| Yes                                                                                         | 767 (5.4)                        | 14,113                          | 5.3                         | (5.3-5.4)     | 0.042          |
| No                                                                                          | 250,802 (5.8)                    | 4,294,622                       | 5.8                         | (5.8-5.9)     |                |
| <b>Severe mental illness</b>                                                                |                                  |                                 |                             |               |                |
| Yes                                                                                         | 11,019 (4.7)                     | 235,241                         | 4.7                         | (4.6-4.8)     | <0.0001        |
| No                                                                                          | 240,550 (5.9)                    | 4,073,494                       | 5.9                         | (5.9-5.9)     |                |
| <b>Substance abuse</b>                                                                      |                                  |                                 |                             |               |                |
| Yes                                                                                         | 12,154 (3.9)                     | 312,525                         | 3.9                         | (3.8-4.0)     | <0.0001        |
| No                                                                                          | 239,415 (5.9)                    | 3,996,210                       | 6.0                         | (6.0-6.0)     |                |
| <b>Alcohol use disorder</b>                                                                 |                                  |                                 |                             |               |                |
| Yes                                                                                         | 7223 (3.7)                       | 194,350                         | 3.7                         | (3.6-3.8)     | <0.0001        |
| No                                                                                          | 244,346 (5.9)                    | 4,114,385                       | 5.9                         | (5.9-6.0)     |                |
| <b>Drug use disorder</b>                                                                    |                                  |                                 |                             |               |                |
| Yes                                                                                         | 6421 (3.8)                       | 170,047                         | 3.8                         | (3.7-3.9)     | <0.0001        |
| No                                                                                          | 245,148 (5.9)                    | 4,138,688                       | 5.9                         | (5.9-5.9)     |                |
| <b>Mental disorder</b>                                                                      |                                  |                                 |                             |               |                |
| Yes                                                                                         | 33,175 (5.3)                     | 623,138                         | 5.3                         | (5.3-5.4)     | <0.0001        |
| No                                                                                          | 218,394 (5.9)                    | 3,685,597                       | 5.9                         | (5.9-5.9)     |                |
| <b>Chronic medical condition</b>                                                            |                                  |                                 |                             |               |                |
| Yes                                                                                         | 133,366 (5.0)                    | 2,670,334                       | 5.0                         | (5.0-5.0)     | <0.0001        |
| No                                                                                          | 118,203 (7.2)                    | 1,368,401                       | 7.2                         | (7.2-7.3)     |                |
| CIF=cumulative incidence function                                                           |                                  |                                 |                             |               |                |
| <b>Supplementary table 16: Cumulative incidence of a PCR-confirmed SARS-CoV-2 infection</b> |                                  |                                 |                             |               |                |



**Supplementary figure 5a: Cumulative incidence of PCR-confirmed SARS-CoV-2 infection**

**a. Low educational level**

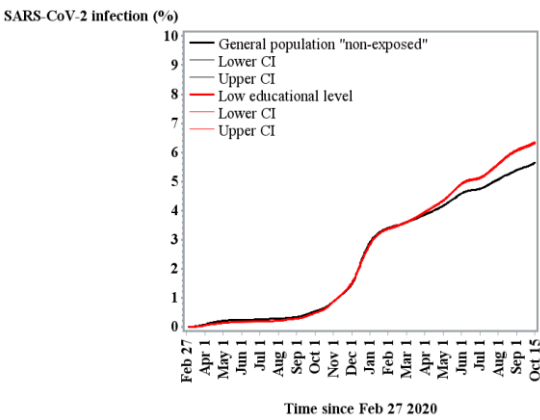

**b. Homelessness**

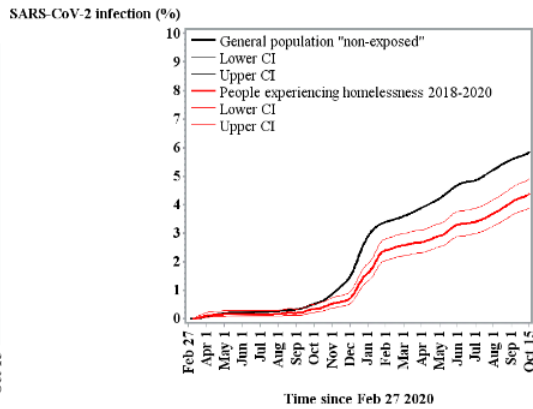

**c. Imprisonment**

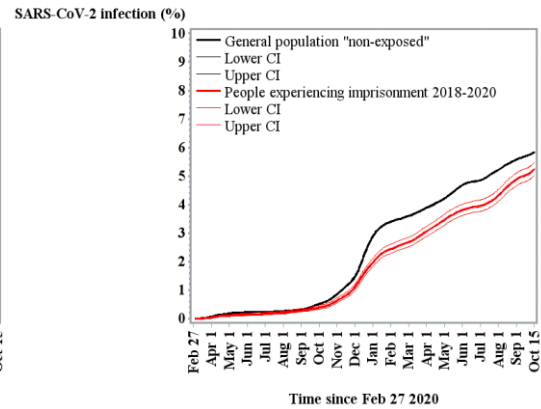

**d. Substance abuse**

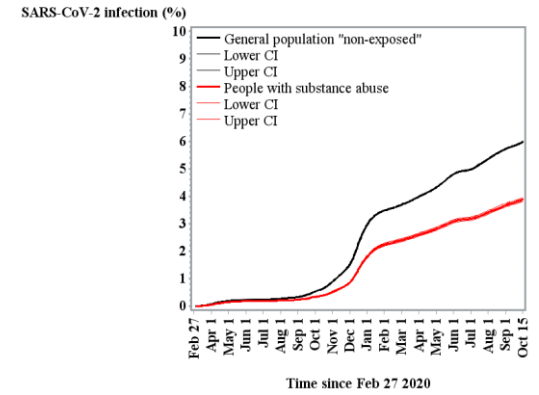

**e. Supported psychiatric housing**

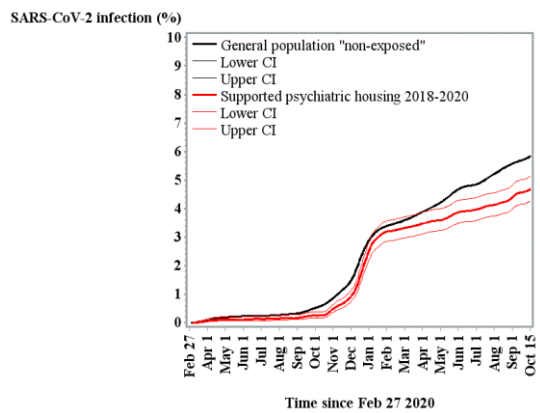

**f. Psychiatric admission**

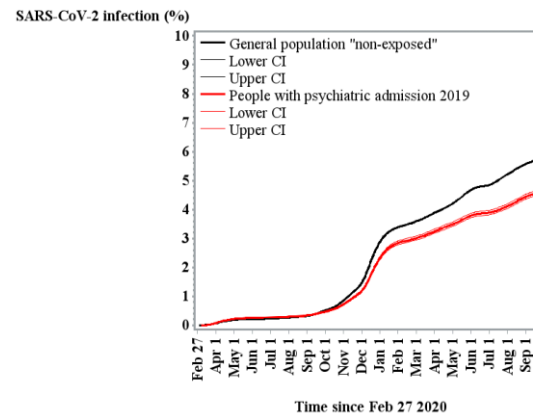

**g. Severe mental illness**

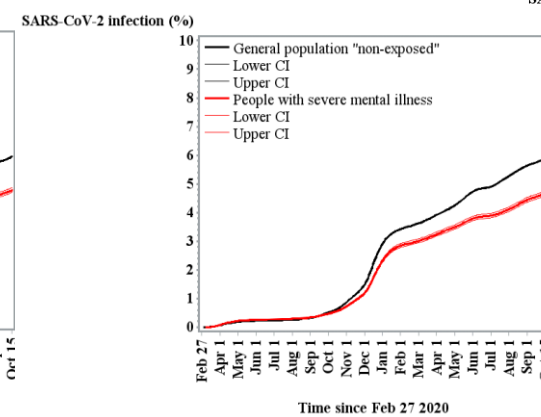

**h. Chronic medical condition**

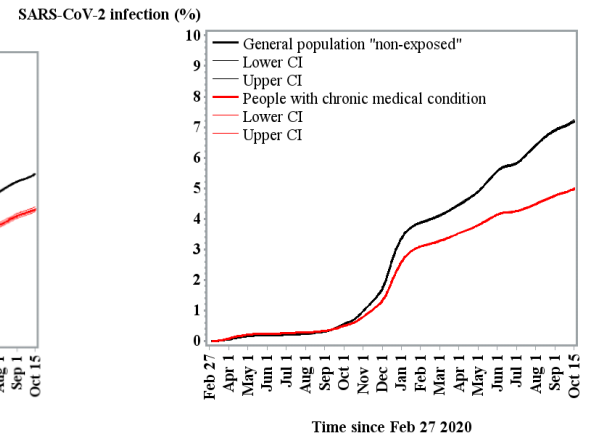

**Supplementary figure 5b: Cumulative incidence of PCR-confirmed SARS-CoV-2 infection**

**a. Overall**

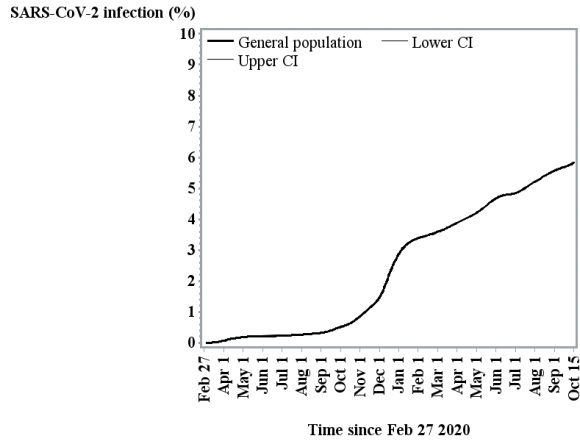

**b. Sex**

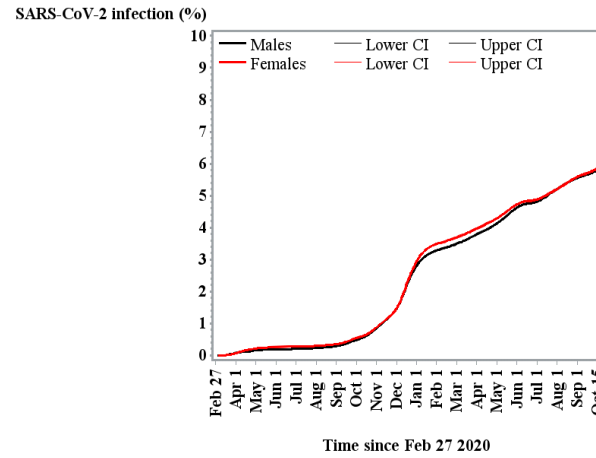

**c. Crisis shelter**

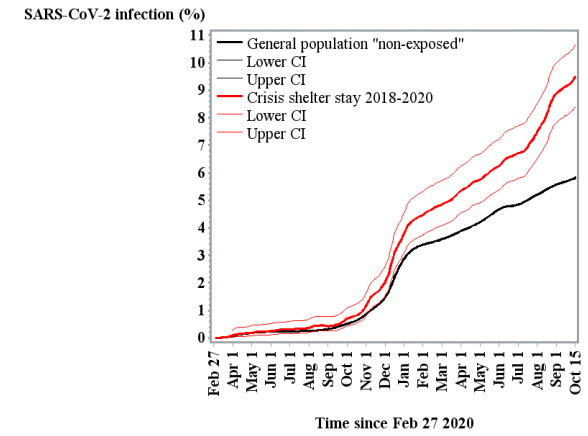

**d. Alcohol use disorder**

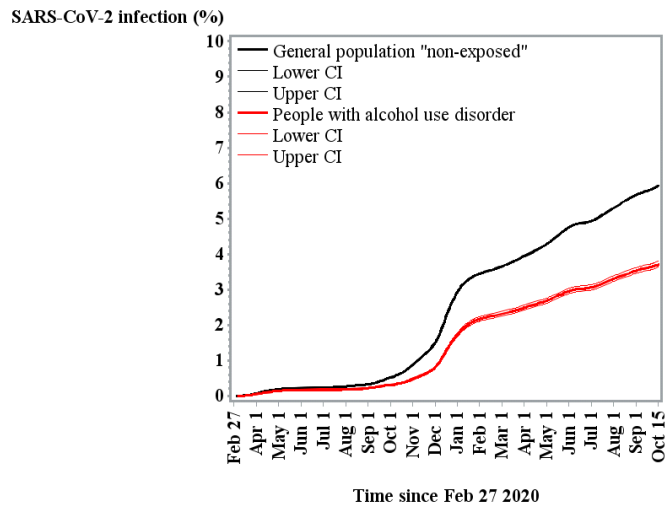

**e. Drug use disorder**

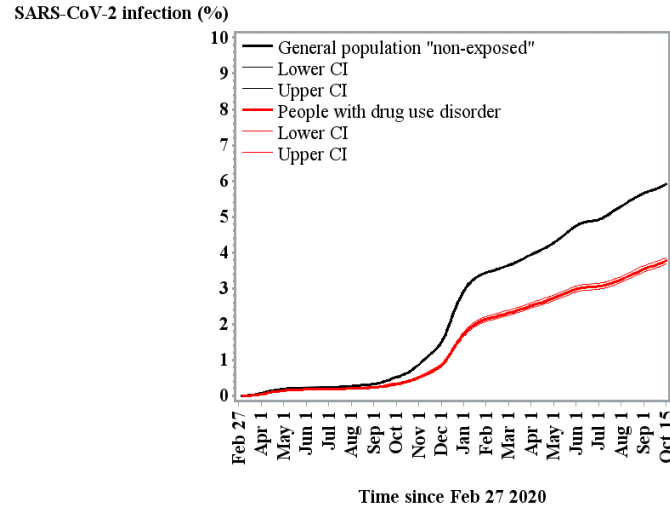

**f. Any mental disorder**

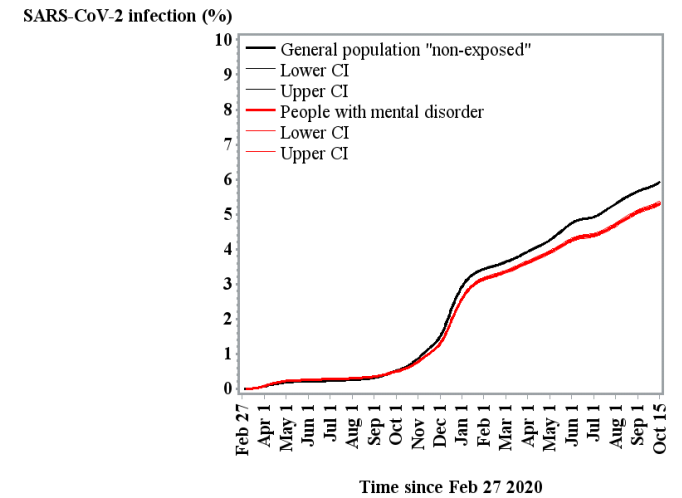

|                                                                                                              | <b>SARS-CoV-2 infections</b>   | <b>IRR*</b> | <b>(95% CI)</b> | <b>P value</b> |
|--------------------------------------------------------------------------------------------------------------|--------------------------------|-------------|-----------------|----------------|
| <b>Overall</b>                                                                                               | 256,998/6,899,076 person-years |             |                 |                |
| <b>Low educational level</b>                                                                                 |                                |             |                 |                |
| Yes                                                                                                          | 79,683/1,939,879               | 0.99        | (0.98-1.00)     | 0.11           |
| No                                                                                                           | 177,315/4,959,197              | 1           |                 |                |
| <b>Homelessness</b>                                                                                          |                                |             |                 |                |
| Yes                                                                                                          | 268/10,423                     | 0.61        | (0.54-0.69)     | <0.0001        |
| No                                                                                                           | 256,730/6,888,653              | 1           |                 |                |
| <b>Crisis shelter use</b>                                                                                    |                                |             |                 |                |
| Yes                                                                                                          | 257/4238                       | 1.21        | (1.07-1.37)     | 0.0034         |
| No                                                                                                           | 256,741/6,894,838              | 1           |                 |                |
| <b>Imprisonment</b>                                                                                          |                                |             |                 |                |
| Yes                                                                                                          | 1989                           | 0.84        | (0.80-0.88)     | <0.0001        |
| No                                                                                                           | 255,009/6,839,942              | 1           |                 |                |
| <b>Substance abuse</b>                                                                                       |                                |             |                 |                |
| Yes                                                                                                          | 12,159/500,900                 | 0.69        | (0.67-0.70)     | <0.0001        |
| No                                                                                                           | 244,839/6,398,176              | 1           |                 |                |
| <b>Alcohol use disorder</b>                                                                                  |                                |             |                 |                |
| Yes                                                                                                          | 7224/311,682                   | 0.67        | (0.66-0.69)     | <0.0001        |
| No                                                                                                           | 249,774/6,587,394              | 1           |                 |                |
| <b>Drug use disorder</b>                                                                                     |                                |             |                 |                |
| Yes                                                                                                          | 6425/272696                    | 0.65        | (0.64-0.67)     | <0.0001        |
| No                                                                                                           | 250573/6626380                 | 1           |                 |                |
| <b>Supported psychiatric housing</b>                                                                         |                                |             |                 |                |
| Yes                                                                                                          | 439/14709                      | 0.59        | (0.54-0.65)     | <0.0001        |
| No                                                                                                           | 256,559/6,884,367              | 1           |                 |                |
| <b>Psychiatric admission</b>                                                                                 |                                |             |                 |                |
| Yes                                                                                                          | 776/22,628                     | 0.94        | (0.88-1.01)     | 0.084          |
| No                                                                                                           | 256,222/6,876,448              | 1           |                 |                |
| <b>Severe mental illness</b>                                                                                 |                                |             |                 |                |
| Yes                                                                                                          | 11,037/375,786                 | 0.83        | (0.81-0.84)     | <0.0001        |
| No                                                                                                           | 245,961/6,523,290              | 1           |                 |                |
| <b>Mental disorder</b>                                                                                       |                                |             |                 |                |
| Yes                                                                                                          | 33,643/1,000,605               | 0.84        | (0.83-0.85)     | <0.0001        |
| No                                                                                                           | 223,355/5,898,471              | 1           |                 |                |
| <b>Chronic medical condition</b>                                                                             |                                |             |                 |                |
| Yes                                                                                                          | 107,589/3,511,354              | 1.04        | (1.03-1.05)     | <0.0001        |
| No                                                                                                           | 149,409/3,387,721              | 1           |                 |                |
| IRR=incidence rate ratio                                                                                     |                                |             |                 |                |
| *Adjusted for age (5-years age groups), calendar time (months), and sex.                                     |                                |             |                 |                |
| <b>Supplementary table 17: Risk of a PCR-confirmed SARS-CoV-2 infection in the Danish general population</b> |                                |             |                 |                |

|                                                                                                              | <b>Numbers</b> | <b>Individuals</b> | <b>OR*</b> | <b>(95% CI)</b> | <b>P value</b> |
|--------------------------------------------------------------------------------------------------------------|----------------|--------------------|------------|-----------------|----------------|
|                                                                                                              | 3,634,074      | 4,308,735          |            |                 |                |
| <b>Low educational level</b>                                                                                 |                |                    |            |                 |                |
| Yes                                                                                                          | 939,575        | 1,173,496          | 0.64       | (0.64-0.64)     | <0.0001        |
| No                                                                                                           | 2,694,499      | 3,135,239          | 1          |                 |                |
| <b>Homelessness</b>                                                                                          |                |                    |            |                 |                |
| Yes                                                                                                          | 4922           | 6375               | 0.48       | (0.46-0.51)     | <0.0001        |
| No                                                                                                           | 3,629,152      | 4,302,360          | 1          |                 |                |
| <b>Crisis shelter</b>                                                                                        |                |                    |            |                 |                |
| Yes                                                                                                          | 2403           | 2638               | 0.96       | (0.84-1.10)     | 0.54           |
| No                                                                                                           | 3,631,671      | 4,306,097          | 1          |                 |                |
| <b>Imprisonment</b>                                                                                          |                |                    |            |                 |                |
| Yes                                                                                                          | 27,487         | 36,271             | 0.47       | (0.46-0.48)     | <0.0001        |
| No                                                                                                           | 3,606,587      | 4,272,464          | 1          |                 |                |
| <b>Substance abuse</b>                                                                                       |                |                    |            |                 |                |
| Yes                                                                                                          | 254,763        | 312,525            | 0.82       | (0.81-0.83)     | <0.0001        |
| No                                                                                                           | 3,379,311      | 3,996,210          | 1          |                 |                |
| <b>Alcohol use disorder</b>                                                                                  |                |                    |            |                 |                |
| Yes                                                                                                          | 155,988        | 194,350            | 0.78       | (0.77-0.79)     | <0.0001        |
| No                                                                                                           | 3,478,086      | 4,114,385          | 1          |                 |                |
| <b>Drug use disorder</b>                                                                                     |                |                    |            |                 |                |
| Yes                                                                                                          | 139,967        | 170,047            | 0.82       | (0.81-0.83)     | <0.0001        |
| No                                                                                                           | 3,494,107      | 4,138,688          | 1          |                 |                |
| <b>Supported psychiatric housing</b>                                                                         |                |                    |            |                 |                |
| Yes                                                                                                          | 7577           | 9142               | 0.63       | (0.60-0.67)     | <0.0001        |
| No                                                                                                           | 3,626,497      | 4,299,593          | 1          |                 |                |
| <b>Psychiatric admission</b>                                                                                 |                |                    |            |                 |                |
| Yes                                                                                                          | 11,560         | 14,113             | 1.07       | (1.02-1.12)     | 0.0047         |
| No                                                                                                           | 3,622,514      | 4,294,622          | 1          |                 |                |
| <b>Severe mental disorder</b>                                                                                |                |                    |            |                 |                |
| Yes                                                                                                          | 193046         | 235241             | 0.83       | (0.82-0.84)     | <0.0001        |
| No                                                                                                           | 3,441,028      | 4,073,494          | 1          |                 |                |
| <b>Mental disorder</b>                                                                                       |                |                    |            |                 |                |
| Yes                                                                                                          | 518,843        | 623,138            | 0.84       | (0.83-0.84)     | <0.0001        |
| No                                                                                                           | 3,115,231      | 3,685,597          | 1          |                 |                |
| <b>Chronic medical condition</b>                                                                             |                |                    |            |                 |                |
| Yes                                                                                                          | 2,212,176      | 2,670,334          | 1.55       | (1.54-1.56)     | <0.0001        |
| No                                                                                                           | 1,421,898      | 1,638,401          | 1          |                 |                |
| OR=odds ratio                                                                                                |                |                    |            |                 |                |
| *Adjusted for 5-years age groups and sex.                                                                    |                |                    |            |                 |                |
| <b>Supplementary table 18: Odds for having any PCR-test for SARS-CoV-2 infection during the study period</b> |                |                    |            |                 |                |

## Reference list

1. Statistics Denmark. Shelters. 2020. <https://www.dst.dk/en/Statistik/dokumentation/documentationofstatistics/shelters> (accessed Oct 15, 2021). 2021).
2. National Board of Health. The Registry of Drug Abusers Undergoing Treatment. 2020. <https://sundhedsdatastyrelsen.dk/da/registre-og-services/om-de-nationale-sundhedsregistre/sygdomme-laegemidler-og-behandlinger/stofmisbrugere-i-behandling> (accessed March 5, 2021).
3. National Board of Health. The National Registry of Alcohol Treatment. 2020. <https://sundhedsdatastyrelsen.dk/da/registre-og-services/om-de-nationale-sundhedsregistre/sygdomme-laegemidler-og-behandlinger/alkoholbehandlingsregisteret> (accessed March 5, 2021).
4. Statistics Denmark. Imprisonments 2020. <https://www.dst.dk/en/Statistik/dokumentation/documentationofstatistics/imprisonments> (accessed November 20, 2021).
5. Pottegård A, Schmidt SAJ, Wallach-Kildemoes H, Sørensen HT, Hallas J, Schmidt M. Data Resource Profile: The Danish National Prescription Registry. *Int J Epidemiol* 2017; **46**: 798-f.
6. Schmidt M, Schmidt SA, Sandegaard JL, Ehrenstein V, Pedersen L, Sørensen HT. The Danish National Patient Registry: a review of content, data quality, and research potential. *Clin Epidemiol* 2015; **7**: 449-90.
7. Mors O, Perto GP, Mortensen PB. The Danish Psychiatric Central Research Register. *Scand J Public Health* 2011; **39**: 54-7.
8. Ministry of the Interior and Housing. Tilbudsportalen. 2021. <https://tilbudsportalen.dk/tilbudssoegning/landing/index> (accessed August 8, 2021).
9. Agency for Data Supply and Efficiency. Denmark's addresses. 2020. <https://danmarksadresser.dk/adresser-i-danmark/> (accessed September 15, 2020).
10. Momen NC, Plana-Ripoll O, Agerbo E, et al. Association between Mental Disorders and Subsequent Medical Conditions. *N Engl J Med* 2020; **382**: 1721-31.
11. Prior A, Fenger-Grøn M, Larsen KK, et al. The Association Between Perceived Stress and Mortality Among People With Multimorbidity: A Prospective Population-Based Cohort Study. *Am J Epidemiol* 2016; **184**: 199-210.
